# Supplementary material for: Kinetic Evidence of an Apparent Negative Activation Enthalpy in an Organocatalytic Process
Source: PubMed Central journal article supplement — Sci Rep. 2013 Aug 30;3:2557. doi: 10.1038/srep02557 (PMC3757351; doi:10.1038/srep02557), 2013-08-30
Supplement: srep02557-s1.pdf [file srep02557-s1.pdf]

## Supporting Information

### Kinetic Evidence of an Apparent Negative Activation Enthalpy in an Organocatalytic Process

Xiao Han,<sup>1,2</sup> Richmond Lee,<sup>2</sup> Tao Chen,<sup>2</sup> Jie Luo,<sup>1</sup> Yixin Lu,<sup>\*,1</sup> Kuo-Wei Huang<sup>\*,1,2</sup>

<sup>1</sup> Department of Chemistry, National University of Singapore, 3 Science Drive 3, Singapore, 117543, Republic of Singapore.

<sup>2</sup> King Abdullah University of Science and Technology (KAUST), Division of Physical Sciences and Engineering and KAUST Catalysis Center, Thuwal 23955-6900, Saudi Arabia

|                                                                                                                      |    |
|----------------------------------------------------------------------------------------------------------------------|----|
| 1. Representative procedure of asymmetric Mannich reaction of fluorinated ketoester with imine....                   | 01 |
| 2. Mannich reaction of imine and fluorinated ketoester (1:10) catalyzed by Trp-1.....                                | 02 |
| 3. Mannich reaction of imine and fluorinated ketoester (10:1) catalyzed by Trp-1.....                                | 04 |
| 4. Mannich reaction of imine and fluorinated ketoester (1:1) catalyzed by Trp-1 with different catalyst loading..... | 05 |
| 5. Mannich reaction of imine and fluorinated ketoester (1:1) catalyzed by Trp-1 at different temperatures .....      | 10 |
| 6. Mannich reaction of imine and fluorinated ketoester (1:1) catalyzed by DABCO at different temperatures .....      | 14 |
| 7. Thermodynamic Data and Cartesian Coordinates of Optimized Stationary Points.....                                  | 20 |

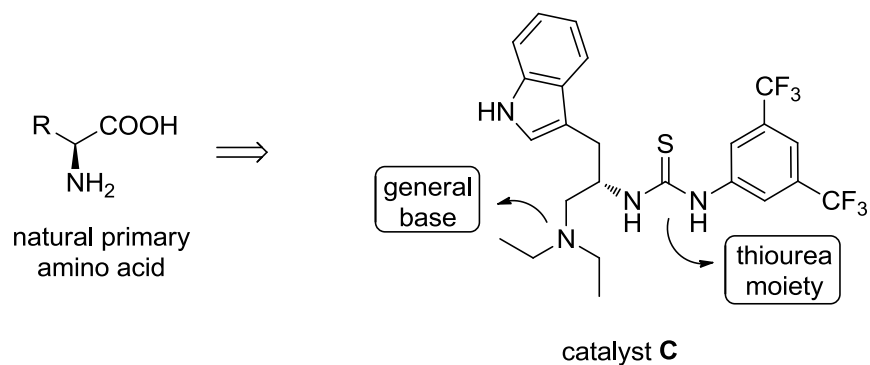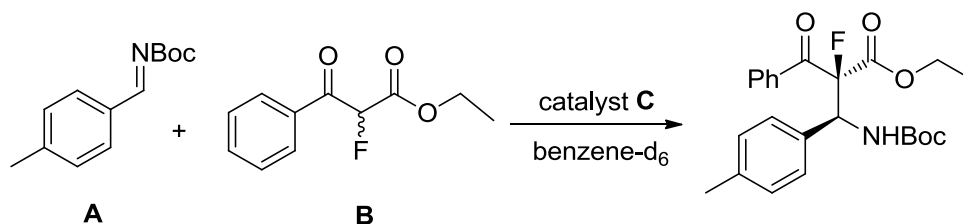

### 1. Representative Procedure of Asymmetric Mannich Reaction of Fluorinated Ketoester with Imine Catalyzed by a Tryptophan Derived Catalyst

Ketoester **B** and 1,4-dimethoxybenzene stock solution (0.5 M **B** and 0.25 M 1,4-dimethoxybenzene; 100  $\mu\text{L}$ ), imine **A** stock solution (0.25 M, 200  $\mu\text{L}$ ), deuterated benzene (150  $\mu\text{L}$ ) and catalyst **C** (0.1 M, 50  $\mu\text{L}$ ) were added into a dried NMR tube, mixed well, and submitted to kinetic experiment immediately. The total volume is assumed to be 500  $\mu\text{L}$ .

### 2. Mannich Reaction of Imine and Fluorinated Ketoester (1:10) Catalyzed by Trp-1

In our reaction, the rate is given by  $\text{rate} = k [\text{A}]^a [\text{B}]^b [\text{C}]^c$  where  $k$  is the rate constant,  $[\text{A}]$ ,  $[\text{B}]$  and  $[\text{C}]$  represent the concentrations of the species A, B and the Catalyst (M, mole/liter), and  $a$ ,  $b$  and  $c$  are reaction orders on A, B, and C, respectively, to be determined experimentally.

The kinetic measurement was first carried out with imine **A** (0.05 mmol), ketoester **B** (0.5 mmol), catalyst **C** (0.005 mmol) in benzene- $d_6$  at 285K and monitored by  $^1\text{H}$  NMR spectroscopy. Since B is in 10 fold excess to A, [B] can be treated as a constant. The rate law can be simplified to:  $\text{rate} = k_{\text{obs}} [\text{A}]^a$

**Table 1** | Mannich reaction of imine and a large excess of fluorinated ketoester carried out in the presence of 10 mol% catalyst<sup>†</sup>.

| Entry | Time (s) | $I_A^{\ddagger}$ | $[A]^{\S}$ (M) | $-\ln([A]/[A]^0)$ |
|-------|----------|------------------|----------------|-------------------|
| 1     | 99       | 0.6456           | 0.06456        | 0.4376            |
| 2     | 151      | 0.5426           | 0.05426        | 0.6114            |
| 3     | 203      | 0.4639           | 0.04639        | 0.7681            |
| 4     | 255      | 0.3891           | 0.03891        | 0.9439            |
| 5     | 307      | 0.3229           | 0.03229        | 1.1304            |
| 6     | 359      | 0.2665           | 0.02665        | 1.3224            |
| 7     | 411      | 0.2225           | 0.02225        | 1.5028            |
| 8     | 463      | 0.1894           | 0.01894        | 1.6639            |
| 9     | 515      | 0.1515           | 0.01515        | 1.8885            |

<sup>†</sup>Reaction was carried out with imine (0.05 mmol) and ketoester (0.5 mmol) in benzene- $d_6$  at 285K. <sup>‡</sup>Integration value of imine. <sup>§</sup>Concentration of imine.

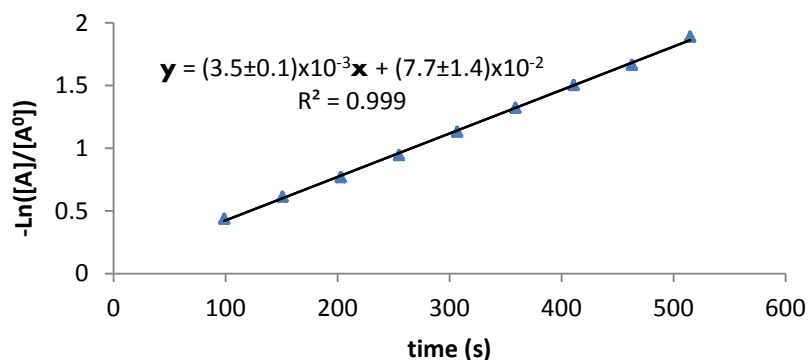

**Figure 1** |  $-\ln([A]/[A]_0)$  vs. time for the Mannich reaction monitored by  $^1\text{H}$  NMR spectroscopy in the presence of 10 mol% catalyst.

From the above data, plotting  $-\ln([A]/[A]^0)$  versus time gave a straight line ( $R^2 = 0.999$ ), indicating the reaction was first-order to imine **A**.

### 3. Mannich Reaction of Imine and Fluorinated Ketoester (10:1) Catalyzed by Trp-1

By the same procedure with A in 10 fold excess, it was determined that the reaction is first order to ketoester **B**.

**Table 2** | Mannich reaction of ketoester and a large excess of imine carried out in the presence of 10 mol% catalyst<sup>†</sup>.

| Entry | Time (s) | $I_B^{\ddagger}$ | $[B]^{\S}$ (M) | $-\ln([B]/[B]^0)$ |
|-------|----------|------------------|----------------|-------------------|
| 1     | 153      | 1.6336           | 0.05445        | 0.6078            |
| 2     | 204      | 1.3487           | 0.04496        | 0.7995            |
| 3     | 255      | 1.1229           | 0.03743        | 0.9827            |
| 4     | 306      | 0.9377           | 0.03126        | 1.1629            |
| 5     | 357      | 0.791            | 0.02637        | 1.3331            |
| 6     | 408      | 0.691            | 0.02303        | 1.4682            |
| 7     | 459      | 0.5594           | 0.01865        | 1.6795            |
| 8     | 510      | 0.4716           | 0.01572        | 1.8502            |
| 9     | 561      | 0.3818           | 0.01273        | 2.0615            |

<sup>†</sup>Reaction was carried out with imine (0.5 mmol) and ketoester (0.05 mmol) in benzene- $d_6$  at 285K. <sup>‡</sup>Integration value of ketoester. <sup>§</sup>Concentration of ketoester.

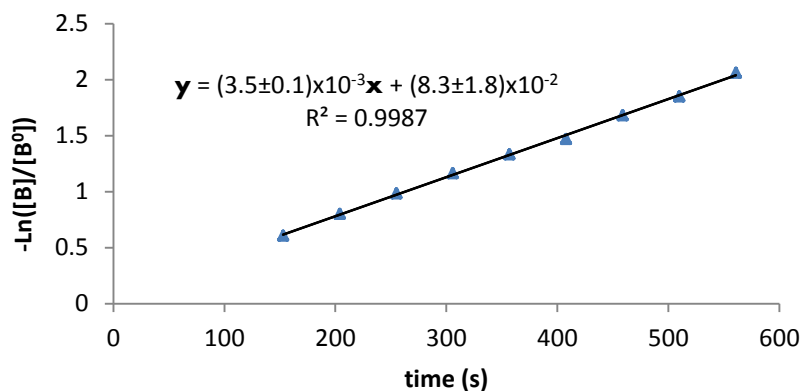

**Figure 2** |  $-\ln([B]/[B]_0)$  vs. time for the Mannich reaction monitored by  $^1\text{H}$  NMR spectroscopy in the presence of 10 mol% catalyst.

#### 4. Mannich Reaction of Imine and Fluorinated Ketoester (1:1) Catalyzed by Trp-1 with Different Catalyst Loading

As the rate law for the Mannich reaction is  $\text{rate} = k [\text{A}][\text{B}][\text{C}]^c$ , when  $[\text{A}]_0 = [\text{B}]_0$  (and therefore  $[\text{A}]_t = [\text{B}]_t$ ), the integrated second order rate law,  $1/[\text{A}] = kt + 1/[\text{A}]_0$ , can be utilized. The kinetics was carried out with imine **A** (0.05 mmol), ketoester **B** (0.05 mmol), and catalyst **C** (10 mol%, 15 mol%, 20 mol%, 25 mol%) in benzene- $d_6$  at 298K. The volume of the mixture was fixed to 500  $\mu\text{L}$ .

**Table 3** | Mannich reaction of ketoester and imine carried out in the presence of 10 mol% catalyst†.

| Entry | Time (s) | $I_A^\ddagger$ | $[\text{A}]^{\S}$ (M) | $1/[\text{A}]$ ( $\text{M}^{-1}$ ) |
|-------|----------|----------------|-----------------------|------------------------------------|
| 1     | 179      | 0.8940         | 0.0894                | 11.1857                            |
| 2     | 509      | 0.7785         | 0.0779                | 12.8452                            |
| 3     | 839      | 0.6936         | 0.0694                | 14.4175                            |
| 4     | 1169     | 0.6217         | 0.0622                | 16.0849                            |
| 5     | 1499     | 0.5656         | 0.0566                | 17.6803                            |
| 6     | 1829     | 0.5183         | 0.0518                | 19.2938                            |
| 7     | 2159     | 0.4733         | 0.0473                | 21.1282                            |
| 8     | 2489     | 0.4404         | 0.0440                | 22.7066                            |
| 9     | 2819     | 0.4130         | 0.0413                | 24.2131                            |
| 10    | 3149     | 0.3837         | 0.0384                | 26.0620                            |
| 11    | 3479     | 0.3640         | 0.0364                | 27.4725                            |

|    |       |        |        |         |
|----|-------|--------|--------|---------|
| 12 | 3809  | 0.3473 | 0.0347 | 28.7936 |
| 13 | 4139  | 0.3276 | 0.0328 | 30.5250 |
| 14 | 4469  | 0.3114 | 0.0311 | 32.1130 |
| 15 | 4799  | 0.2962 | 0.0296 | 33.7610 |
| 16 | 5129  | 0.2880 | 0.0288 | 34.7222 |
| 17 | 5459  | 0.2734 | 0.0273 | 36.5764 |
| 18 | 5789  | 0.2614 | 0.0261 | 38.2555 |
| 19 | 6119  | 0.2524 | 0.0252 | 39.6197 |
| 20 | 6449  | 0.2422 | 0.0242 | 41.2882 |
| 21 | 8099  | 0.2048 | 0.0205 | 48.8281 |
| 22 | 9749  | 0.1789 | 0.0179 | 55.8971 |
| 23 | 11399 | 0.1588 | 0.0159 | 62.9723 |
| 24 | 13049 | 0.1445 | 0.0145 | 69.2042 |
| 25 | 16349 | 0.1175 | 0.0118 | 85.1064 |

†Reaction was carried out with imine (0.05 mmol) and ketoester (0.05 mmol) in benzene-d<sub>6</sub>. ‡Integration value of imine. §Concentration of imine.

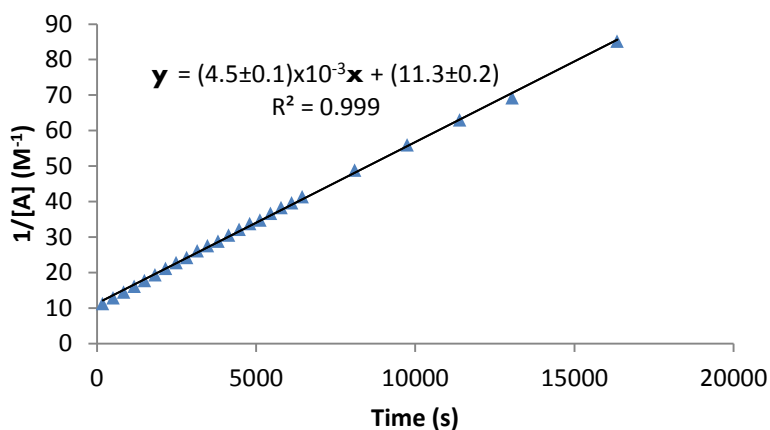

**Figure 3** |  $1/[A]$  vs. time for the Mannich reaction monitored by  $^1\text{H}$  NMR spectroscopy in the presence of 10 mol% catalyst.

**Table 4** | Mannich reaction of ketoester and imine carried out in the presence of 15 mol% catalyst†.

| Entry | time (s) | $I_A$ ‡ | $[A]$ § (M) | $1/[A]$ (M <sup>-1</sup> ) |
|-------|----------|---------|-------------|----------------------------|
| 1     | 218      | 0.8457  | 0.0846      | 11.8245                    |
| 2     | 398      | 0.7686  | 0.0769      | 13.0107                    |
| 3     | 578      | 0.7073  | 0.0707      | 14.1383                    |
| 4     | 758      | 0.6548  | 0.0655      | 15.2718                    |
| 5     | 938      | 0.6086  | 0.0609      | 16.4312                    |
| 6     | 1118     | 0.5721  | 0.0572      | 17.4795                    |
| 7     | 1298     | 0.5342  | 0.0534      | 18.7196                    |

|    |      |        |        |         |
|----|------|--------|--------|---------|
| 8  | 1478 | 0.5052 | 0.0505 | 19.7941 |
| 9  | 1658 | 0.4783 | 0.0478 | 20.9074 |
| 10 | 1838 | 0.4534 | 0.0453 | 22.0556 |

†Reaction was carried out with imine (0.05 mmol) and ketoester (0.05 mmol) in benzene-d<sub>6</sub>. ‡Integration value of imine. §Concentration of imine.

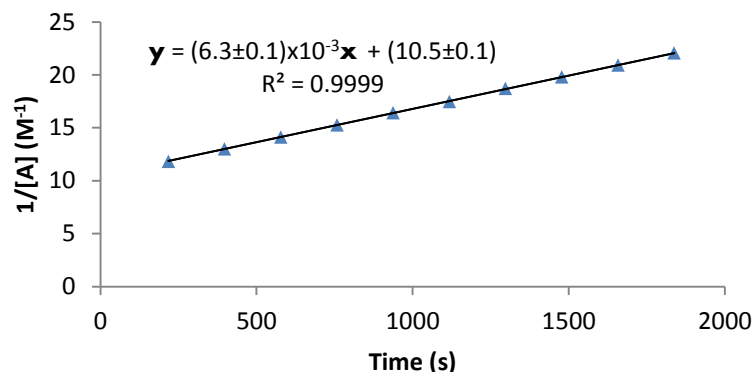

**Figure 4** |  $1/[A]$  vs. time for the Mannich reaction monitored by  $^1\text{H}$  NMR spectroscopy in the presence of 15 mol% catalyst.

**Table 5** | Mannich reaction of ketoester and imine carried out in the presence of 20 mol% catalyst†.

| Entry | Time (s) | $I_A^\ddagger$ | $[A]^\S$ (M) | $1/[A]$ ( $M^{-1}$ ) |
|-------|----------|----------------|--------------|----------------------|
| 1     | 173      | 0.8704         | 0.0870       | 11.4890              |
| 2     | 323      | 0.7674         | 0.0767       | 13.0310              |
| 3     | 473      | 0.6929         | 0.0693       | 14.4321              |
| 4     | 623      | 0.6325         | 0.0633       | 15.8103              |
| 5     | 773      | 0.5847         | 0.0585       | 17.1028              |
| 6     | 923      | 0.5427         | 0.0543       | 18.4264              |
| 7     | 1073     | 0.5075         | 0.0508       | 19.7044              |
| 8     | 1223     | 0.4780         | 0.0478       | 20.9205              |
| 9     | 1373     | 0.4519         | 0.0452       | 22.1288              |
| 10    | 1523     | 0.4281         | 0.0428       | 23.3590              |
| 11    | 1673     | 0.4067         | 0.0407       | 24.5881              |
| 12    | 1823     | 0.3885         | 0.0389       | 25.7400              |
| 13    | 1973     | 0.3737         | 0.0374       | 26.7594              |
| 14    | 2123     | 0.3572         | 0.0357       | 27.9955              |
| 15    | 2273     | 0.3431         | 0.0343       | 29.1460              |

†Reaction was carried out with imine (0.05 mmol) and ketoester (0.05 mmol) in benzene-d<sub>6</sub>. ‡Integration value of imine. §Concentration of imine.

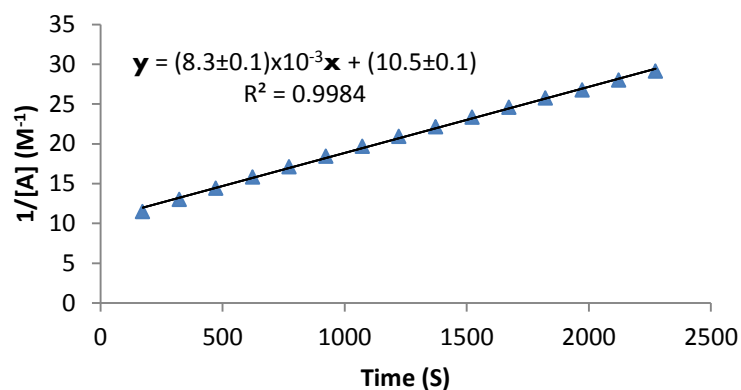

**Figure 5** |  $1/[A]$  vs. time for the Mannich reaction monitored by  $^1\text{H}$  NMR spectroscopy in the presence of 20 mol% catalyst.

**Table 6** | Mannich reaction of ketoester and imine carried out in the presence of 25 mol% catalyst†.

| Entry | Time (s) | $I_A^\ddagger$ | $[A]^\S$ (M) | $1/[A]$ ( $\text{M}^{-1}$ ) |
|-------|----------|----------------|--------------|-----------------------------|
| 1     | 113      | 0.9072         | 0.0907       | 11.0229                     |
| 2     | 263      | 0.7581         | 0.0758       | 13.1909                     |
| 3     | 413      | 0.6612         | 0.0661       | 15.1240                     |
| 4     | 563      | 0.5867         | 0.0587       | 17.0445                     |
| 5     | 713      | 0.5374         | 0.0537       | 18.6081                     |
| 6     | 863      | 0.4943         | 0.0494       | 20.2306                     |
| 7     | 1013     | 0.4536         | 0.0454       | 22.0459                     |
| 8     | 1163     | 0.4202         | 0.0420       | 23.7982                     |
| 9     | 1313     | 0.3949         | 0.0395       | 25.3229                     |
| 10    | 1463     | 0.3691         | 0.0369       | 27.0929                     |
| 11    | 1613     | 0.3497         | 0.0350       | 28.5959                     |
| 12    | 1763     | 0.3337         | 0.0334       | 29.9670                     |
| 13    | 1913     | 0.3159         | 0.0316       | 31.6556                     |
| 14    | 2063     | 0.3000         | 0.0300       | 33.3333                     |
| 15    | 2213     | 0.2890         | 0.0289       | 34.6021                     |

†Reaction was carried out with imine (0.05 mmol) and ketoester (0.05 mmol) in benzene- $d_6$ .  $^\ddagger$ Integration value of imine.  $^\S$ Concentration of imine.



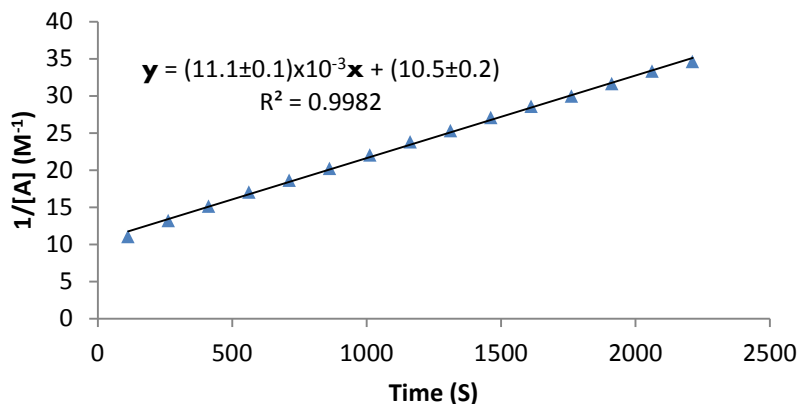

**Figure 6** |  $1/[A]$  vs. time for the mannich reaction monitored by <sup>1</sup>H NMR spectroscopy in the presence of 25 mol% catalyst.

**Table 7** | Observed reaction rate based on imine.

| Cat. Loading (mol%) | [A] <sub>0</sub> (M) | [B] <sub>0</sub> (M) | [Cat.] (M) | K <sub>obs</sub> (M <sup>-1</sup> s <sup>-1</sup> ) |
|---------------------|----------------------|----------------------|------------|-----------------------------------------------------|
| 10                  | 0.1000               | 0.1000               | 0.0100     | $(4.5 \pm 0.1) \times 10^{-3}$                      |
| 15                  | 0.1000               | 0.1000               | 0.0150     | $(6.3 \pm 0.1) \times 10^{-3}$                      |
| 20                  | 0.1020               | 0.1000               | 0.0200     | $(8.3 \pm 0.1) \times 10^{-3}$                      |
| 25                  | 0.1000               | 0.1000               | 0.0250     | $(11.1 \pm 0.1) \times 10^{-3}$                     |

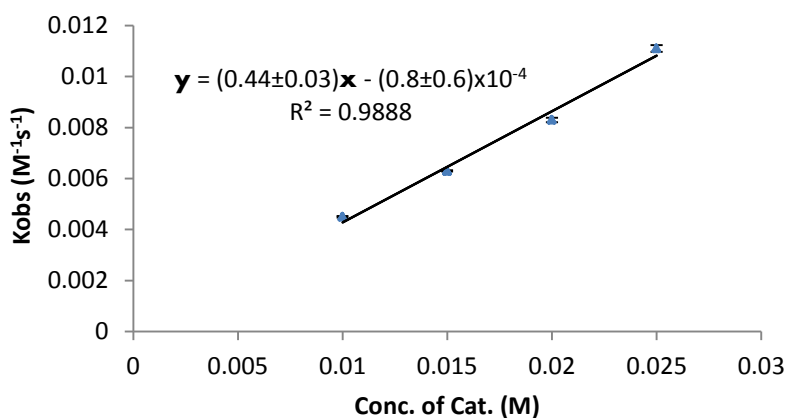

**Figure 7** |  $K_{obs}$  based on imine vs. concentration of catalyst for the Mannich reaction.

The plot of the concentration of catalyst C with  $k_{obs}$  gives a straight line with zero intercept, suggesting the reaction is also first order to C.

5. Mannich Reaction of Imine and Fluorinated Ketoester (1:1) Catalyzed by Trp-1 at Different Temperatures

**Table 8** | Mannich reaction of imine and fluorinated ketoester carried out in the presence of 12 mol% catalyst at 283K<sup>†</sup>

| Entry | Time (s) | $I_A^{\ddagger}$ | $[A]^{\S}$ (M) | $1/[A]$ ( $M^{-1}$ ) |
|-------|----------|------------------|----------------|----------------------|
| 1     | 119      | 0.9387           | 0.0939         | 10.6530              |
| 2     | 321      | 0.8083           | 0.0808         | 12.3716              |
| 3     | 523      | 0.7089           | 0.0709         | 14.1064              |
| 4     | 725      | 0.6334           | 0.0633         | 15.7878              |
| 5     | 927      | 0.5726           | 0.0573         | 17.4642              |
| 6     | 1129     | 0.5237           | 0.0524         | 19.0949              |
| 7     | 1331     | 0.4831           | 0.0483         | 20.6996              |
| 8     | 1533     | 0.4465           | 0.0447         | 22.3964              |
| 9     | 1735     | 0.4157           | 0.0416         | 24.0558              |
| 10    | 1937     | 0.3919           | 0.0392         | 25.5167              |
| 11    | 2139     | 0.3678           | 0.0368         | 27.1887              |
| 12    | 2341     | 0.3492           | 0.0349         | 28.6369              |
| 13    | 2543     | 0.3302           | 0.0330         | 30.2847              |
| 14    | 2745     | 0.3144           | 0.0314         | 31.8066              |

<sup>†</sup>Reaction was carried out with imine (0.05 mmol) and ketoester (0.05 mmol) in benzene-d<sub>6</sub>. <sup>‡</sup>Integration value of imine. <sup>§</sup>Concentration of imine.

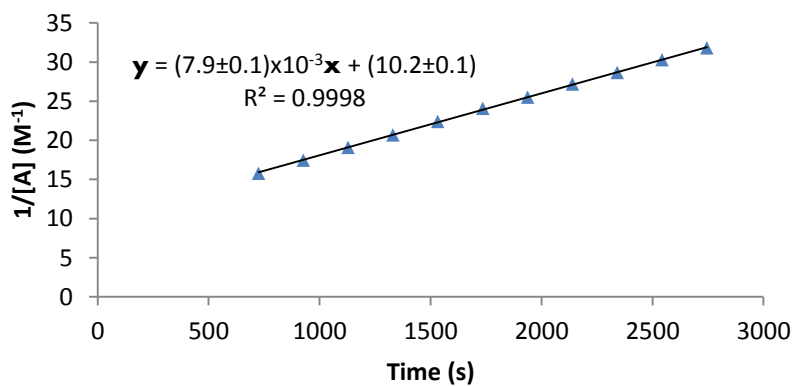

**Figure 8** |  $1/[A]$  vs. time monitored by <sup>1</sup>H NMR spectroscopy in the presence of 12 mol% catalyst at 283K.

**Table 9** | Mannich reaction of imine and fluorinated ketoester carried out in the presence of 12 mol% catalyst at 293K<sup>†</sup>

| Entry | Time (s) | I <sub>A</sub> <sup>‡</sup> | [A] <sup>§</sup> (M) | 1/[A] (M <sup>-1</sup> ) |
|-------|----------|-----------------------------|----------------------|--------------------------|
| 1     | 233      | 0.8803                      | 0.0880               | 11.3598                  |
| 2     | 433      | 0.7720                      | 0.0772               | 12.9534                  |
| 3     | 633      | 0.6931                      | 0.0693               | 14.4279                  |
| 4     | 833      | 0.6297                      | 0.0630               | 15.8806                  |
| 5     | 1033     | 0.5781                      | 0.0578               | 17.2980                  |
| 6     | 1233     | 0.5334                      | 0.0533               | 18.7477                  |
| 7     | 1433     | 0.4990                      | 0.0499               | 20.0401                  |
| 8     | 1633     | 0.4579                      | 0.0458               | 21.8388                  |
| 9     | 1833     | 0.4311                      | 0.0431               | 23.1965                  |
| 10    | 2033     | 0.4039                      | 0.0404               | 24.7586                  |
| 11    | 2233     | 0.3864                      | 0.0386               | 25.8799                  |
| 12    | 2433     | 0.3638                      | 0.0364               | 27.4876                  |
| 13    | 2633     | 0.3469                      | 0.0347               | 28.8268                  |
| 14    | 2833     | 0.3329                      | 0.0333               | 30.0391                  |
| 15    | 3033     | 0.3184                      | 0.0318               | 31.4070                  |

<sup>†</sup>Reaction was carried out with imine (0.05 mmol) and ketoester (0.05 mmol) in benzene-d<sub>6</sub>. <sup>‡</sup>Integration value of imine. <sup>§</sup>Concentration of imine.

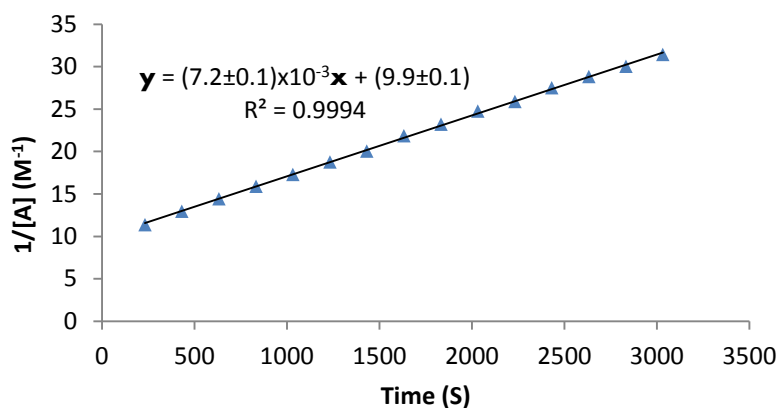

**Figure 9** | 1/[A] vs. time monitored by <sup>1</sup>H NMR spectroscopy in the presence of 12 mol% catalyst at 293K.

**Table 10** | Mannich reaction of imine and fluorinated ketoester carried out in the presence of 12 mol% catalyst at 303K<sup>†</sup>

| Entry | Time (s) | $I_A^{\ddagger}$ | $[A]^{\S}$ (M) | $1/[A]$ ( $M^{-1}$ ) |
|-------|----------|------------------|----------------|----------------------|
| 1     | 145      | 0.9568           | 0.0957         | 10.4515              |
| 2     | 347      | 0.8581           | 0.0858         | 11.6537              |
| 3     | 549      | 0.7728           | 0.0773         | 12.9400              |
| 4     | 751      | 0.7046           | 0.0705         | 14.1924              |
| 5     | 953      | 0.6435           | 0.0644         | 15.5400              |
| 6     | 1155     | 0.5977           | 0.0598         | 16.7308              |
| 7     | 1357     | 0.5698           | 0.0570         | 17.5500              |
| 8     | 1559     | 0.5241           | 0.0524         | 19.0803              |
| 9     | 1761     | 0.5017           | 0.0502         | 19.9322              |
| 10    | 1963     | 0.4554           | 0.0455         | 21.9587              |
| 11    | 2165     | 0.4397           | 0.0440         | 22.7428              |
| 12    | 2367     | 0.4197           | 0.0420         | 23.8265              |
| 13    | 2569     | 0.3921           | 0.0392         | 25.5037              |

<sup>†</sup>Reaction was carried out with imine (0.05 mmol) and ketoester (0.05 mmol) in benzene-d<sub>6</sub>. <sup>‡</sup>Integration value of imine. <sup>§</sup>Concentration of imine.

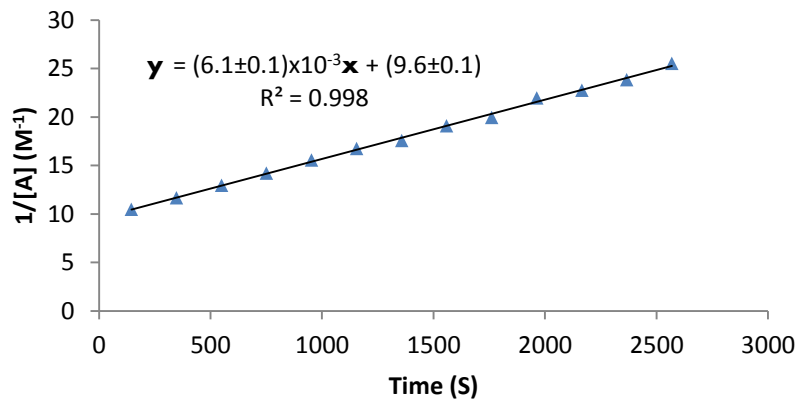

**Figure 10** |  $1/[A]$  vs. time monitored by <sup>1</sup>H NMR spectroscopy in the presence of 12 mol% catalyst at 303K.

**Table 11** | Mannich reaction of imine and fluorinated ketoester carried out in the presence of 12 mol% catalyst at 323K<sup>†</sup>

| Entry | Time (s) | $I_A^{\ddagger}$ | $[A]^{\S}$ (M) | $1/[A]$ ( $M^{-1}$ ) |
|-------|----------|------------------|----------------|----------------------|
| 1     | 150      | 0.9574           | 0.0957         | 10.4450              |
| 2     | 352      | 0.8592           | 0.0859         | 11.6387              |
| 3     | 554      | 0.7865           | 0.0787         | 12.7146              |
| 4     | 756      | 0.7232           | 0.0723         | 13.8274              |
| 5     | 958      | 0.6652           | 0.0665         | 15.0331              |
| 6     | 1160     | 0.6241           | 0.0624         | 16.0231              |
| 7     | 1362     | 0.5542           | 0.0554         | 18.0440              |
| 8     | 1564     | 0.5491           | 0.0549         | 18.2116              |
| 9     | 1766     | 0.5173           | 0.0517         | 19.3311              |
| 10    | 1968     | 0.4935           | 0.0494         | 20.2634              |
| 11    | 2170     | 0.4641           | 0.0464         | 21.5471              |
| 12    | 2372     | 0.4339           | 0.0434         | 23.0468              |
| 13    | 2574     | 0.4123           | 0.0412         | 24.2542              |
| 14    | 2776     | 0.3945           | 0.0395         | 25.3485              |

<sup>†</sup>Reaction was carried out with imine (0.05 mmol) and ketoester (0.05 mmol) in benzene-d<sub>6</sub>. <sup>‡</sup>Integration value of imine. <sup>§</sup>Concentration of imine.

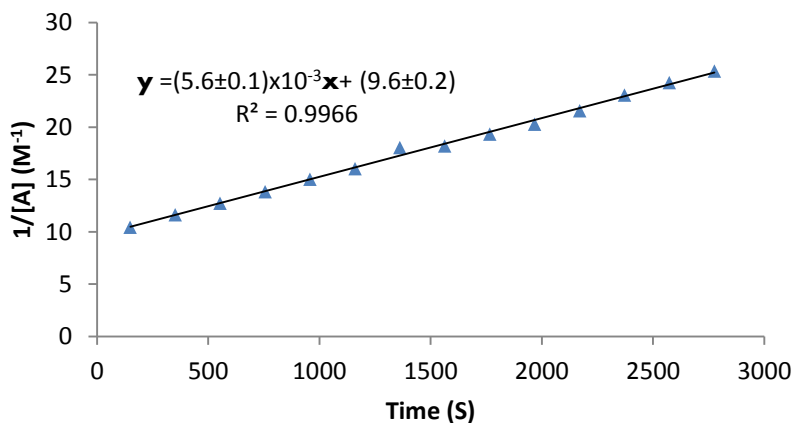

**Figure 11** |  $1/[A]$  vs. time monitored by <sup>1</sup>H NMR spectroscopy in the presence of 12 mol% catalyst at 313K.

**Table 12** | Activation parameters for Mannich reaction of imine and fluorinated ketoester catalyzed by **Trp-1** at different temperature

| Entry | T (K) | $K_{obs}$ ( $M^{-1}s^{-1}$ )   | k ( $M^{-2}s^{-1}$ ) | ee (%) |
|-------|-------|--------------------------------|----------------------|--------|
| 1     | 283   | $(7.9 \pm 0.1) \times 10^{-3}$ | $0.66 \pm 0.01$      | 93     |
| 2     | 293   | $(7.2 \pm 0.1) \times 10^{-3}$ | $0.60 \pm 0.01$      | 93     |
| 3     | 303   | $(6.1 \pm 0.1) \times 10^{-3}$ | $0.51 \pm 0.01$      | 93     |
| 4     | 313   | $(5.6 \pm 0.1) \times 10^{-3}$ | $0.47 \pm 0.01$      | 93     |

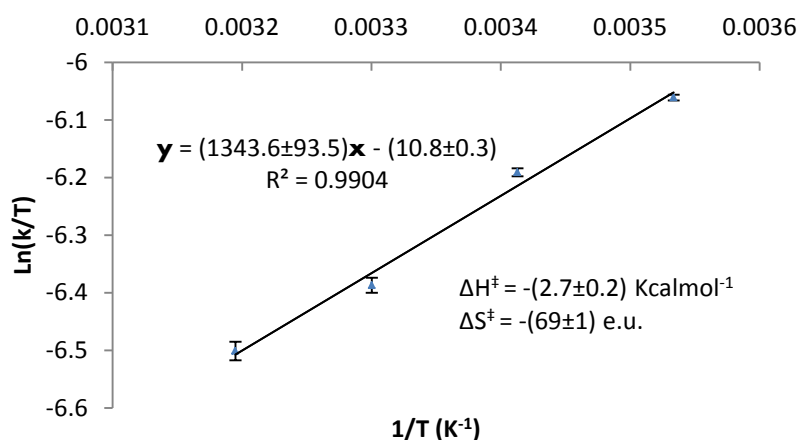

**Figure 12** | Eyring plots showing the temperature dependent behavior of the Mannich reaction measured by  $^1H$  NMR spectroscopy.

## 6. Mannich Reaction of Imine and Fluorinated Ketoester Catalyzed by DABCO at Different Temperatures

**Table 13.** Mannich reaction of imine and fluorinated ketoester carried out in the presence of 30 mol% DABCO at 293K<sup>a</sup>.

| Entry | Time (S) | $I_B^b$ | $[B]^c$ (M) | $1/[B]$ ( $M^{-1}$ ) |
|-------|----------|---------|-------------|----------------------|
| 1     | 182      | 2.4373  | 0.0812      | 12.3087              |
| 2     | 332      | 2.1989  | 0.0733      | 13.6432              |
| 3     | 482      | 1.9983  | 0.0666      | 15.0128              |
| 4     | 632      | 1.8129  | 0.0604      | 16.5481              |
| 5     | 782      | 1.6672  | 0.0556      | 17.9942              |
| 6     | 932      | 1.5357  | 0.0512      | 19.5351              |

|   |      |        |        |         |
|---|------|--------|--------|---------|
| 7 | 1082 | 1.4144 | 0.0471 | 21.2104 |
|---|------|--------|--------|---------|

[a] Reaction was carried out with imine (0.05 mmol) and ketoester (0.05 mmol) in the 0.5 ml solvent. [b] Integration value of ketoester. [c] Concentration of ketoester.

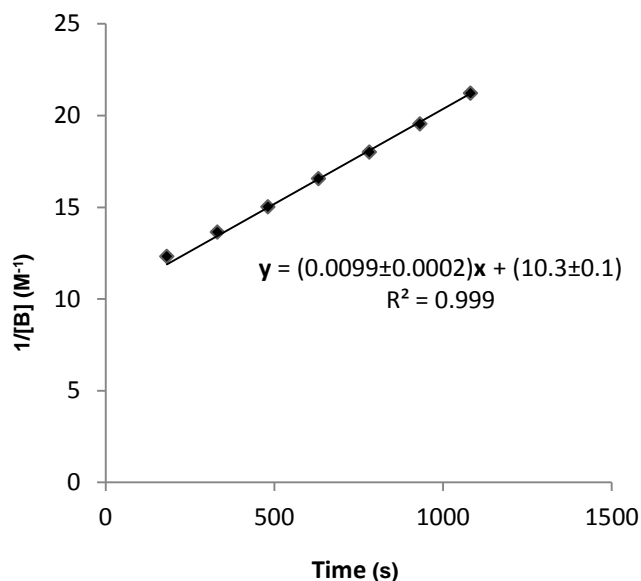

**Figure 13.**  $1/[B]$  vs. time monitored by  $^1\text{H}$  NMR spectroscopy in the presence of 30 mol% DABCO at 283K.

**Table 14.** Mannich reaction of imine and fluorinated ketoester carried out in the presence of 30 mol% DABCO at 293K<sup>a</sup>.

| Entry | Time (S) | $I_B^b$ | $[B]^c$ (M) | $1/[B]$ ( $\text{M}^{-1}$ ) |
|-------|----------|---------|-------------|-----------------------------|
| 1     | 150      | 2.5231  | 0.0841      | 11.8901                     |
| 2     | 300      | 2.1692  | 0.0723      | 13.8300                     |
| 3     | 450      | 1.8929  | 0.0631      | 15.8487                     |
| 4     | 600      | 1.7155  | 0.0572      | 17.4876                     |
| 5     | 750      | 1.5513  | 0.0517      | 19.3386                     |
| 6     | 900      | 1.4101  | 0.0470      | 21.2751                     |
| 7     | 1050     | 1.2808  | 0.0427      | 23.4229                     |
| 8     | 1200     | 1.1761  | 0.0392      | 25.5080                     |
| 9     | 1350     | 1.1100  | 0.0370      | 27.0270                     |
| 10    | 1500     | 1.0347  | 0.0345      | 28.9939                     |

[a] Reaction was carried out with imine (0.05 mmol) and ketoester (0.05 mmol) in the 0.5 ml solvent. [b] Integration value of ketoester. [c] Concentration of ketoester.

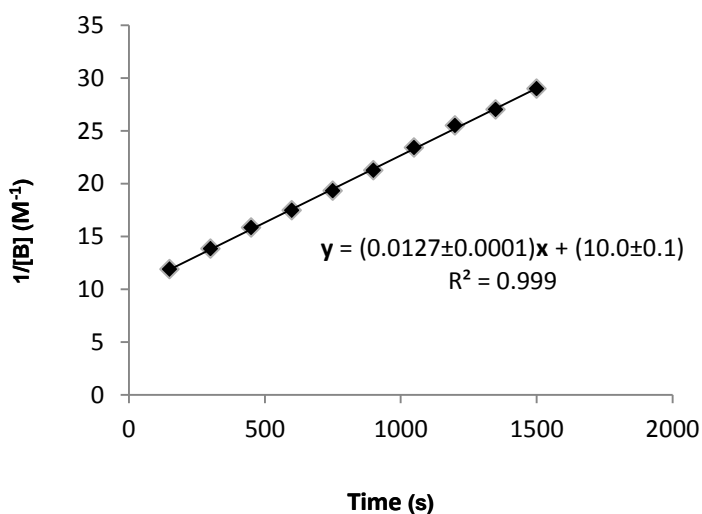

**Figure 14.**  $1/[B]$  vs. time monitored by  $^1H$  NMR spectroscopy in the presence of 30 mol% DABCO at 293K.

**Table 15.** Mannich reaction of imine and fluorinated ketoester carried out in the presence of 30 mol% DABCO at 303K<sup>a</sup>.

| Entry | Time (S) | $I_B^b$ | $[B]^c$ (M) | $1/[B]$ ( $M^{-1}$ ) |
|-------|----------|---------|-------------|----------------------|
| 1     | 154      | 2.3769  | 0.0792      | 12.6215              |
| 2     | 304      | 1.9857  | 0.0662      | 15.1080              |
| 3     | 454      | 1.7097  | 0.0570      | 17.5469              |
| 4     | 604      | 1.5168  | 0.0506      | 19.7785              |
| 5     | 754      | 1.3782  | 0.0459      | 21.7675              |
| 6     | 904      | 1.2495  | 0.0417      | 24.0096              |
| 7     | 1054     | 1.1508  | 0.0384      | 26.0688              |
| 8     | 1204     | 1.0734  | 0.0358      | 27.9486              |
| 9     | 1354     | 1.0021  | 0.0334      | 29.9371              |
| 10    | 1504     | 0.9411  | 0.0314      | 31.8776              |

[a] Reaction was carried out with imine (0.05 mmol) and ketoester (0.05 mmol) in the 0.5 ml solvent. [b] Integration value of ketoester. [c] Concentration of ketoester.



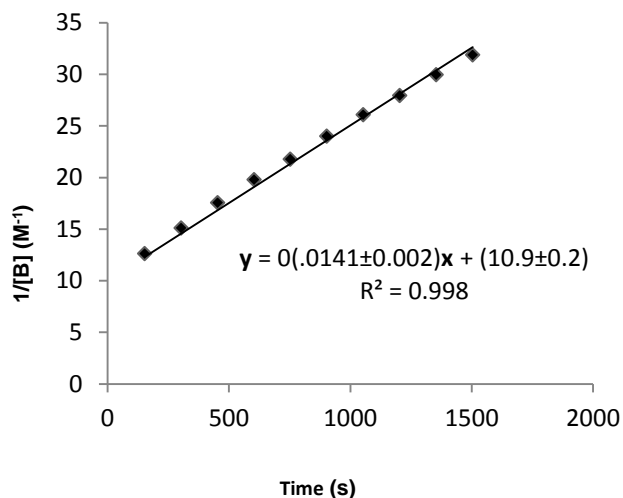

**Figure 15.**  $1/[B]$  vs. time monitored by  $^1\text{H}$  NMR spectroscopy in the presence of 30 mol% DABCO at 303K.

**Table 16.** Activation parameters for Mannich reaction of imine and fluorinated ketoester catalyzed by **DABCO** at different temperature

| Entry | T (K) | $K_{\text{obs}}$ ( $10^{-2}\text{M}^{-1}\text{s}^{-1}$ ) | k ( $\text{M}^{-2}\text{s}^{-1}$ ) |
|-------|-------|----------------------------------------------------------|------------------------------------|
| 1     | 283   | $0.99\pm 0.02$                                           | $0.33\pm 0.01$                     |
| 2     | 293   | $1.27\pm 0.01$                                           | $0.42\pm 0.01$                     |
| 3     | 303   | $1.41\pm 0.02$                                           | $0.47\pm 0.01$                     |

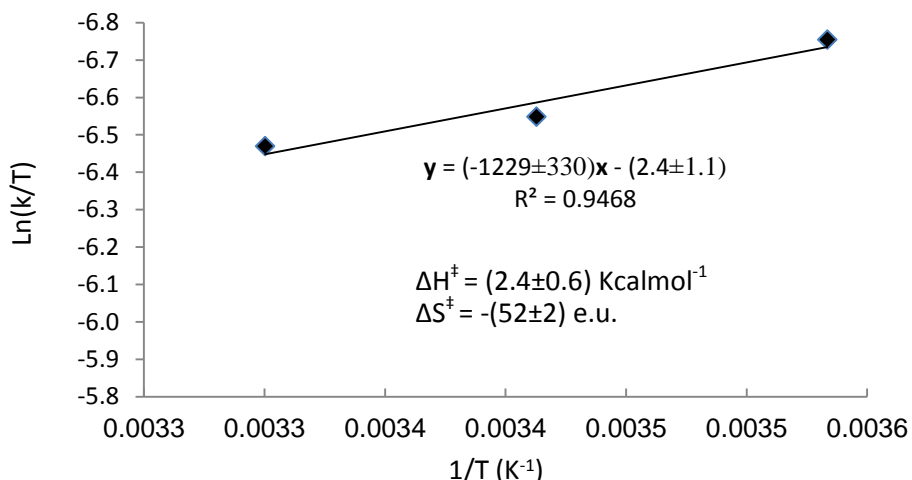

**Figure 17.** Eyring plots showing the temperature dependent behavior of the Mannich reaction measured by  $^1\text{H}$  NMR spectroscopy

## 7. Thermodynamic Data and Cartesian

## Catalyst

### Coordinates of Optimized Stationary Points

Zero-point correction=  
0.481034  
Sum of electronic and thermal Enthalpies=  
-2145.698396  
Sum of electronic and thermal Free Energies=  
-2145.806283

### Imine

Zero-point correction=  
0.278425  
Sum of electronic and thermal Enthalpies=  
-710.419828  
Sum of electronic and thermal Free Energies=  
-710.483570

|   |          |          |          |
|---|----------|----------|----------|
| H | -1.18511 | 1.982047 | 0.321025 |
| C | -0.31412 | 2.581517 | 0.561368 |
| C | 1.951983 | 4.088844 | 1.155788 |
| C | 0.953343 | 2.102041 | 0.193915 |
| C | -0.43516 | 3.795129 | 1.215649 |
| C | 0.693949 | 4.571147 | 1.524977 |
| C | 2.082192 | 2.870144 | 0.498197 |
| H | -1.42033 | 4.156749 | 1.495954 |
| H | 3.067269 | 2.507929 | 0.218352 |
| H | 2.837647 | 4.672993 | 1.385831 |
| C | 0.539834 | 5.886759 | 2.233511 |
| H | -0.061   | 6.583327 | 1.640566 |
| H | 1.507073 | 6.355249 | 2.424661 |
| H | 0.030747 | 5.75848  | 3.193539 |
| C | 1.119993 | 0.828556 | -0.49196 |
| H | 2.143909 | 0.525352 | -0.74243 |
| N | 0.126297 | 0.077042 | -0.79743 |
| C | 0.476459 | -1.12937 | -1.44294 |
| O | 1.602379 | -1.56631 | -1.58582 |
| O | -0.64186 | -1.71831 | -1.86096 |
| C | -0.60771 | -2.99687 | -2.5702  |
| C | -0.0233  | -4.08033 | -1.66991 |
| H | -0.56798 | -4.12126 | -0.72289 |
| H | 1.032048 | -3.90149 | -1.46569 |
| H | -0.12515 | -5.05133 | -2.16228 |
| C | -2.08283 | -3.26286 | -2.8436  |
| H | -2.6429  | -3.32257 | -1.90753 |
| H | -2.19809 | -4.20765 | -3.38051 |
| H | -2.51166 | -2.46208 | -3.45061 |
| C | 0.162832 | -2.8524  | -3.8786  |
| H | 0.064136 | -3.77465 | -4.45761 |
| H | 1.221211 | -2.6646  | -3.69933 |
| H | -0.24988 | -2.03306 | -4.47327 |

|   |          |          |          |
|---|----------|----------|----------|
| C | -2.71904 | 5.479489 | 2.383684 |
| S | -4.13396 | 4.613973 | 2.549666 |
| N | -2.42569 | 6.641211 | 3.071978 |
| H | -1.70458 | 7.207639 | 2.648779 |
| N | -1.71634 | 5.150393 | 1.533281 |
| H | -0.76846 | 5.413648 | 1.809641 |
| C | -3.13301 | 7.282936 | 4.093425 |
| C | -4.40318 | 8.694478 | 6.163963 |
| C | -3.84766 | 6.591683 | 5.078974 |
| C | -3.05323 | 8.675392 | 4.158618 |
| C | -3.67884 | 9.369048 | 5.190163 |
| C | -4.47622 | 7.30443  | 6.091691 |
| H | -3.90994 | 5.514117 | 5.046092 |
| H | -2.51045 | 9.223444 | 3.395421 |
| H | -4.896   | 9.23544  | 6.961629 |
| C | -5.28382 | 6.572563 | 7.129288 |
| C | -3.51964 | 10.86155 | 5.26374  |
| C | -1.69122 | 3.937189 | 0.731277 |
| H | -2.09774 | 3.115395 | 1.33305  |
| C | -0.21994 | 3.670084 | 0.373343 |
| H | 0.049233 | 4.324492 | -0.46152 |
| H | -0.12721 | 2.636165 | 0.008593 |
| N | 0.694789 | 3.953617 | 1.47628  |
| C | 2.061571 | 4.174185 | 0.998603 |
| H | 2.734737 | 4.063579 | 1.851636 |
| H | 2.34998  | 3.391976 | 0.274224 |
| C | 2.276272 | 5.554653 | 0.394797 |
| H | 3.314424 | 5.666142 | 0.070181 |
| H | 2.06468  | 6.333349 | 1.132543 |
| H | 1.642504 | 5.733135 | -0.47767 |
| C | 0.633733 | 2.913136 | 2.50783  |
| H | 1.189212 | 2.015691 | 2.182902 |
| H | -0.41008 | 2.605801 | 2.611045 |
| C | 1.132479 | 3.379611 | 3.867594 |
| H | 2.184684 | 3.675005 | 3.851925 |
| H | 1.032651 | 2.572135 | 4.597753 |
| H | 0.547012 | 4.231993 | 4.221573 |

|   |          |          |          |
|---|----------|----------|----------|
| C | -2.54922 | 4.071524 | -0.53903 |
| H | -2.1531  | 4.898565 | -1.13902 |
| H | -3.56013 | 4.352757 | -0.22919 |
| C | -2.59653 | 2.818766 | -1.35509 |
| C | -3.25709 | 1.587849 | -1.00466 |
| C | -3.03291 | 0.672817 | -2.06325 |
| H | -1.44717 | 3.285037 | -3.19588 |
| F | -6.60639 | 6.668121 | 6.882935 |
| F | -5.08423 | 7.081687 | 8.361776 |
| F | -4.98542 | 5.264626 | 7.184445 |
| F | -4.49895 | 11.44438 | 5.973911 |
| F | -3.51604 | 11.42773 | 4.040857 |
| F | -2.35132 | 11.20579 | 5.849074 |
| H | -1.98745 | 0.936846 | -3.88986 |
| N | -2.27351 | 1.321254 | -3.00713 |
| C | -2.0207  | 2.606489 | -2.58067 |
| C | -3.54639 | -0.62597 | -2.04838 |
| H | -3.36743 | -1.31647 | -2.86635 |
| C | -4.02999 | 1.181883 | 0.095257 |
| C | -4.54208 | -0.10594 | 0.113404 |
| H | -5.14345 | -0.43176 | 0.955358 |
| C | -4.30041 | -1.00089 | -0.94631 |
| H | -4.71574 | -2.00217 | -0.90277 |
| H | -4.23035 | 1.870258 | 0.910793 |

### Ketoenol

Zero-point correction=  
0.204304  
Sum of electronic and thermal Enthalpies=  
-750.952148  
Sum of electronic and thermal Free Energies=  
-751.009074

|   |          |          |          |
|---|----------|----------|----------|
| C | -0.04282 | 2.006306 | 0.258996 |
| C | 0.076334 | 4.475755 | 1.58168  |
| C | -0.1877  | 2.074126 | 1.653509 |
| C | 0.154624 | 3.195247 | -0.4607  |
| C | 0.21876  | 4.417122 | 0.19686  |
| C | -0.13075 | 3.302142 | 2.303081 |
| H | -0.35378 | 1.175157 | 2.2297   |
| H | 0.257567 | 3.147141 | -1.53742 |
| H | 0.378087 | 5.325636 | -0.37399 |
| H | -0.2503  | 3.339977 | 3.380523 |
| H | 0.123662 | 5.430185 | 2.0954   |
| C | -0.1062  | 0.747367 | -0.50043 |
| C | -0.0129  | -0.5193  | 0.011089 |

|   |          |          |          |
|---|----------|----------|----------|
| C | -0.07288 | -1.6943  | -0.82916 |
| O | -0.25035 | 0.910693 | -1.81707 |
| H | -0.26346 | 0.006228 | -2.22951 |
| O | -0.21188 | -1.6254  | -2.05693 |
| O | 0.035139 | -2.84337 | -0.17388 |
| C | -0.01534 | -4.04086 | -0.97449 |
| H | 0.799546 | -4.0074  | -1.70201 |
| H | -0.9581  | -4.05075 | -1.52711 |
| C | 0.107323 | -5.21533 | -0.03464 |
| H | 1.052233 | -5.18284 | 0.511936 |
| H | 0.072059 | -6.14608 | -0.60643 |
| H | -0.7107  | -5.2247  | 0.688798 |
| F | 0.166451 | -0.73283 | 1.333504 |

### pTS1-I

Zero-point correction=  
0.968485  
Sum of electronic and thermal Enthalpies=  
-3607.081855  
Sum of electronic and thermal Free Energies=  
-3607.267971

|   |          |          |          |
|---|----------|----------|----------|
| C | -3.27606 | 0.226236 | -4.88636 |
| S | -4.64924 | 1.213225 | -4.93272 |
| N | -2.66567 | -0.29854 | -5.98291 |
| N | -2.67033 | -0.13468 | -3.72563 |
| C | -2.98503 | -0.14073 | -7.33459 |
| C | -3.48999 | 0.043598 | -10.097  |
| C | -2.71876 | -1.22421 | -8.18302 |
| C | -3.48988 | 1.0416   | -7.88311 |
| C | -3.73825 | 1.117738 | -9.25087 |
| C | -2.97361 | -1.12618 | -9.54527 |
| H | -2.32457 | -2.14499 | -7.76837 |
| H | -3.69933 | 1.884527 | -7.24017 |
| H | -3.70131 | 0.111312 | -11.1563 |
| C | -2.66409 | -2.28276 | -10.4531 |
| C | -4.22499 | 2.421535 | -9.81762 |
| C | -3.28041 | 0.076527 | -2.4321  |
| H | -4.07771 | 0.805473 | -2.5878  |
| C | -2.26038 | 0.613874 | -1.43959 |
| H | -1.44759 | -0.10529 | -1.31741 |
| H | -2.75148 | 0.77601  | -0.4793  |
| C | -3.93478 | -1.21277 | -1.89157 |
| H | -3.16036 | -1.97315 | -1.76159 |
| H | -4.61211 | -1.56499 | -2.67749 |
| C | -4.68979 | -1.00893 | -0.61623 |

|   |          |          |          |   |          |          |          |
|---|----------|----------|----------|---|----------|----------|----------|
| C | -5.86394 | -0.19552 | -0.42051 | C | 0.28691  | -5.46422 | -7.66417 |
| C | -6.22341 | -0.297   | 0.947152 | C | 1.059259 | -3.31121 | -8.42012 |
| F | -1.46188 | -2.13543 | -11.0561 | H | 0.888587 | -1.70994 | -6.98683 |
| F | -3.57246 | -2.39906 | -11.4426 | H | -0.43599 | -5.55454 | -5.64408 |
| F | -2.63236 | -3.45515 | -9.80043 | H | 0.093937 | -6.51513 | -7.85371 |
| F | -4.75857 | 2.279889 | -11.0448 | H | 1.476873 | -2.68015 | -9.19798 |
| F | -3.21411 | 3.316216 | -9.93625 | H | 1.071373 | -5.08979 | -9.63481 |
| F | -5.15627 | 3.000995 | -9.04048 | H | -1.1418  | 1.770006 | -2.76554 |
| N | -1.6372  | 1.912364 | -1.85758 | N | 1.790605 | 0.988328 | -3.2481  |
| C | -2.6583  | 2.987843 | -2.09604 | C | 1.090092 | 1.597803 | -4.27162 |
| H | -3.28521 | 2.634476 | -2.91827 | C | 2.106185 | -0.25221 | -3.30056 |
| H | -3.28107 | 3.047053 | -1.20019 | H | 1.748073 | -0.8944  | -4.1102  |
| C | -0.53896 | 2.30586  | -0.91371 | C | 2.943404 | -0.88111 | -2.28491 |
| H | -0.00893 | 3.131375 | -1.3887  | C | 4.603611 | -2.13545 | -0.38681 |
| H | 0.149033 | 1.459336 | -0.89304 | C | 3.222431 | -2.24839 | -2.37776 |
| C | -2.05428 | 4.331185 | -2.45859 | C | 3.504247 | -0.14205 | -1.23192 |
| H | -1.36913 | 4.240578 | -3.30395 | C | 4.318635 | -0.76272 | -0.30027 |
| H | -1.52969 | 4.80605  | -1.6264  | C | 4.040853 | -2.86443 | -1.43659 |
| H | -2.86618 | 4.997239 | -2.7583  | H | 2.785047 | -2.83418 | -3.18024 |
| C | -1.00428 | 2.677465 | 0.480795 | H | 3.296982 | 0.920867 | -1.16862 |
| H | -1.48139 | 1.84442  | 1.000093 | H | 4.750713 | -0.18035 | 0.508588 |
| H | -1.69266 | 3.525496 | 0.479796 | H | 4.239608 | -3.92818 | -1.51988 |
| H | -0.12949 | 2.968452 | 1.066804 | C | 5.511633 | -2.78949 | 0.61557  |
| H | -1.88561 | -0.95114 | -5.77985 | H | 5.442567 | -3.8779  | 0.567425 |
| O | -0.599   | -1.70557 | -4.92689 | H | 5.271179 | -2.47612 | 1.635176 |
| C | -0.14706 | -2.89935 | -4.86581 | H | 6.5555   | -2.51472 | 0.430338 |
| C | 0.077923 | -3.56971 | -3.66615 | O | -0.00774 | 2.12011  | -4.10128 |
| C | -0.21299 | -3.08569 | -2.35293 | O | 1.793601 | 1.64535  | -5.39187 |
| O | -0.75152 | -2.01094 | -2.0718  | C | 1.373508 | 2.430697 | -6.56973 |
| H | -1.88686 | -0.80153 | -3.77983 | C | 1.292339 | 3.904135 | -6.19183 |
| F | 0.683959 | -4.80183 | -3.70712 | H | 1.1136   | 4.495328 | -7.09361 |
| O | 0.175612 | -3.95466 | -1.38695 | H | 2.232807 | 4.239215 | -5.74643 |
| C | -0.06446 | -3.5487  | -0.04234 | H | 0.477307 | 4.091788 | -5.49286 |
| H | 0.448837 | -2.60098 | 0.148993 | C | 2.515379 | 2.183896 | -7.54584 |
| H | -1.13676 | -3.37763 | 0.098833 | H | 2.326594 | 2.721108 | -8.47818 |
| C | 0.443208 | -4.64904 | 0.861957 | H | 2.605349 | 1.119277 | -7.7729  |
| H | 1.513644 | -4.80887 | 0.714623 | H | 3.463882 | 2.530753 | -7.12931 |
| H | -0.07395 | -5.58966 | 0.659319 | C | 0.060954 | 1.894397 | -7.11846 |
| H | 0.275538 | -4.38029 | 1.908771 | H | -0.16845 | 2.400194 | -8.05988 |
| C | 0.205615 | -3.56519 | -6.16218 | H | -0.76124 | 2.061374 | -6.42458 |
| C | 0.833251 | -4.66435 | -8.6655  | H | 0.137548 | 0.823641 | -7.31885 |
| C | 0.734927 | -2.76564 | -7.18258 | H | -5.33975 | -1.43308 | 2.504853 |
| C | -0.01669 | -4.92333 | -6.41776 | C | -6.65325 | 0.593086 | -1.27444 |

|   |          |          |          |
|---|----------|----------|----------|
| H | -6.4132  | 0.679517 | -2.33022 |
| C | -7.33049 | 0.366591 | 1.480617 |
| H | -7.59483 | 0.276612 | 2.529442 |
| C | -8.08701 | 1.14243  | 0.614809 |
| H | -8.95614 | 1.668984 | 0.994768 |
| C | -4.3989  | -1.55659 | 0.60664  |
| H | -3.60481 | -2.23673 | 0.878943 |
| N | -5.30906 | -1.12849 | 1.548138 |
| C | -7.75317 | 1.25295  | -0.74834 |
| H | -8.37294 | 1.861205 | -1.39842 |

### TS1-I

Zero-point correction=  
0.968022  
Sum of electronic and thermal Enthalpies=  
-3607.072109  
Sum of electronic and thermal Free Energies=  
-3607.252602  
Imaginary frequency = 225.64i cm<sup>-1</sup>

|   |          |          |          |
|---|----------|----------|----------|
| C | -0.0528  | 0.216481 | 0.058654 |
| S | -0.1214  | 0.272822 | 1.74549  |
| N | 1.110806 | 0.268686 | -0.64901 |
| N | -1.14859 | 0.13133  | -0.72748 |
| C | 2.419293 | 0.346072 | -0.1541  |
| C | 5.103719 | 0.493612 | 0.659592 |
| C | 3.311614 | 1.199731 | -0.80344 |
| C | 2.876756 | -0.4415  | 0.90786  |
| C | 4.205263 | -0.35406 | 1.30537  |
| C | 4.644121 | 1.26238  | -0.40186 |
| H | 2.954498 | 1.830516 | -1.6099  |
| H | 2.19567  | -1.11411 | 1.408923 |
| H | 6.137338 | 0.548879 | 0.975563 |
| C | 5.589876 | 2.148171 | -1.16034 |
| C | 4.678987 | -1.16781 | 2.47727  |
| C | -2.50036 | 0.18263  | -0.21548 |
| H | -2.42162 | 0.033452 | 0.862481 |
| C | -3.34898 | -0.91353 | -0.84497 |
| H | -3.33721 | -0.81072 | -1.93294 |
| H | -4.37051 | -0.81455 | -0.47488 |
| C | -3.14158 | 1.569999 | -0.43635 |
| H | -3.20427 | 1.768639 | -1.50886 |
| H | -2.44241 | 2.299003 | -0.01171 |
| C | -4.48503 | 1.71517  | 0.205188 |
| C | -4.78642 | 1.675816 | 1.61435  |
| C | -6.18665 | 1.850815 | 1.750822 |

|   |          |          |          |
|---|----------|----------|----------|
| F | 5.986708 | 1.572717 | -2.32043 |
| F | 6.705727 | 2.423301 | -0.46439 |
| F | 5.023673 | 3.323497 | -1.49457 |
| F | 4.565353 | -0.48826 | 3.637211 |
| F | 5.977045 | -1.5115  | 2.35772  |
| F | 3.97811  | -2.3072  | 2.623084 |
| N | -2.87887 | -2.30514 | -0.55779 |
| C | -2.64288 | -2.5593  | 0.898007 |
| H | -1.86683 | -1.86024 | 1.215657 |
| H | -3.56039 | -2.30298 | 1.434717 |
| C | -3.77526 | -3.31275 | -1.21122 |
| H | -3.25833 | -4.27045 | -1.14042 |
| H | -3.78456 | -3.04446 | -2.26895 |
| C | -2.18965 | -3.97652 | 1.197538 |
| H | -1.32447 | -4.25004 | 0.589345 |
| H | -2.97528 | -4.72079 | 1.049201 |
| H | -1.88711 | -4.0229  | 2.24589  |
| C | -5.17337 | -3.40947 | -0.63024 |
| H | -5.74078 | -2.48286 | -0.73648 |
| H | -5.17075 | -3.69158 | 0.425276 |
| H | -5.71645 | -4.18624 | -1.1738  |
| H | 1.02137  | 0.267276 | -1.66722 |
| O | 0.384526 | 0.010212 | -3.35224 |
| C | 0.332433 | -0.04108 | -4.5964  |
| C | -0.93906 | 0.047912 | -5.26722 |
| C | -2.04144 | 0.799428 | -4.66807 |
| O | -2.29691 | 0.846609 | -3.47373 |
| H | -1.03814 | 0.182051 | -1.74436 |
| F | -0.8878  | 0.173392 | -6.63052 |
| O | -2.78591 | 1.418921 | -5.59732 |
| C | -3.91685 | 2.152109 | -5.11482 |
| H | -4.58963 | 1.462121 | -4.59681 |
| H | -3.57599 | 2.897996 | -4.39085 |
| C | -4.58399 | 2.791256 | -6.31023 |
| H | -4.91399 | 2.03154  | -7.02199 |
| H | -3.89776 | 3.468987 | -6.82279 |
| H | -5.45596 | 3.36546  | -5.98533 |
| C | 1.601902 | -0.23373 | -5.36932 |
| C | 4.090153 | -0.56644 | -6.62881 |
| C | 2.787288 | 0.172641 | -4.74252 |
| C | 1.685489 | -0.81721 | -6.64089 |
| C | 2.921758 | -0.98874 | -7.25785 |
| C | 4.019298 | 0.019223 | -5.36578 |

|   |          |          |          |
|---|----------|----------|----------|
| H | 2.726325 | 0.615414 | -3.75625 |
| H | 0.79198  | -1.14803 | -7.15116 |
| H | 2.969172 | -1.45234 | -8.23772 |
| H | 4.921257 | 0.354666 | -4.86536 |
| H | 5.050047 | -0.69227 | -7.1188  |
| H | -1.9462  | -2.45573 | -1.06351 |
| C | -1.66736 | -2.01086 | -4.97736 |
| N | -1.73213 | -2.26776 | -3.67244 |
| C | -0.67289 | -2.84231 | -3.05283 |
| H | -0.81586 | -2.36327 | -5.56112 |
| C | -2.92271 | -1.89272 | -5.7447  |
| C | -5.31156 | -1.75935 | -7.25568 |
| C | -2.9016  | -2.02213 | -7.13751 |
| C | -4.15825 | -1.6926  | -5.11794 |
| C | -5.32882 | -1.62602 | -5.86182 |
| C | -4.07571 | -1.95605 | -7.87815 |
| H | -1.9549  | -2.17534 | -7.64488 |
| H | -4.18329 | -1.58642 | -4.04018 |
| H | -6.27758 | -1.4709  | -5.35484 |
| H | -4.03163 | -2.05896 | -8.95848 |
| C | -6.58486 | -1.72634 | -8.0543  |
| H | -6.42107 | -1.3066  | -9.04977 |
| H | -7.35416 | -1.13089 | -7.55666 |
| H | -6.98877 | -2.73584 | -8.18859 |
| O | -0.66678 | -3.03808 | -1.82219 |
| O | 0.331469 | -3.25844 | -3.83588 |
| C | 1.491511 | -3.99318 | -3.32347 |
| C | 1.040805 | -5.31717 | -2.71543 |
| H | 1.919851 | -5.91918 | -2.46955 |
| H | 0.434843 | -5.87848 | -3.43217 |
| H | 0.461739 | -5.15842 | -1.80635 |
| C | 2.311361 | -4.24029 | -4.5839  |
| H | 3.219941 | -4.79337 | -4.33278 |
| H | 2.597886 | -3.2956  | -5.05073 |
| H | 1.738928 | -4.8269  | -5.30724 |
| C | 2.273965 | -3.13673 | -2.33628 |
| H | 3.195386 | -3.65718 | -2.06023 |
| H | 1.695848 | -2.94444 | -1.43363 |
| H | 2.544493 | -2.18352 | -2.7952  |
| H | -7.66818 | 2.17386  | 0.267952 |
| C | -4.00367 | 1.525407 | 2.771453 |
| H | -2.92648 | 1.404315 | 2.701263 |
| C | -6.81978 | 1.870631 | 2.995604 |

|   |          |          |          |
|---|----------|----------|----------|
| H | -7.89273 | 2.008041 | 3.084584 |
| C | -6.02207 | 1.713309 | 4.119343 |
| H | -6.48067 | 1.726296 | 5.10246  |
| C | -5.6823  | 1.910912 | -0.4339  |
| H | -5.88383 | 2.012545 | -1.4907  |
| N | -6.70563 | 1.986519 | 0.48559  |
| C | -4.62884 | 1.54441  | 4.008626 |
| H | -4.03499 | 1.432922 | 4.909513 |

### pTS-II

Zero-point correction=  
0.968099  
Sum of electronic and thermal Enthalpies=  
-3607.081195  
Sum of electronic and thermal Free Energies=  
-3607.268581

|   |          |          |          |
|---|----------|----------|----------|
| C | -0.95014 | 1.191242 | -0.58368 |
| S | -1.85106 | 2.591705 | -0.8451  |
| N | -0.31844 | 0.476023 | -1.55837 |
| N | -0.77392 | 0.650847 | 0.646066 |
| C | -0.05297 | 0.797706 | -2.89551 |
| C | 0.610755 | 1.260295 | -5.58919 |
| C | 1.11096  | 0.244662 | -3.44976 |
| C | -0.88898 | 1.572113 | -3.70263 |
| C | -0.54155 | 1.799436 | -5.03355 |
| C | 1.427983 | 0.471522 | -4.78096 |
| H | 1.761784 | -0.36184 | -2.83117 |
| H | -1.79677 | 1.988221 | -3.29    |
| H | 0.861186 | 1.437544 | -6.62753 |
| C | 2.677051 | -0.11194 | -5.37729 |
| C | -1.43435 | 2.675087 | -5.86882 |
| C | -1.42169 | 1.146653 | 1.840434 |
| C | -0.40554 | 1.290686 | 2.966984 |
| H | 0.003025 | 0.315117 | 3.234985 |
| H | -0.89722 | 1.73356  | 3.833923 |
| C | -2.58256 | 0.22755  | 2.271764 |
| H | -2.19325 | -0.7708  | 2.496371 |
| H | -3.23422 | 0.122542 | 1.397502 |
| C | -3.35908 | 0.750058 | 3.438362 |
| C | -4.13076 | 1.966067 | 3.493845 |
| C | -4.67979 | 2.055775 | 4.797882 |
| H | -3.05612 | -0.76309 | 5.030142 |
| F | 3.30062  | -0.96277 | -4.54767 |
| F | 3.569076 | 0.84833  | -5.70523 |
| F | 2.413747 | -0.78849 | -6.51667 |

|   |          |          |          |   |          |          |          |
|---|----------|----------|----------|---|----------|----------|----------|
| F | -1.24376 | 2.482052 | -7.1882  | H | 3.729084 | -6.09956 | 2.654084 |
| F | -1.21064 | 3.985261 | -5.63203 | H | -1.84517 | 2.120455 | 1.585304 |
| F | -2.73792 | 2.454305 | -5.61865 | H | 0.0637   | -0.42529 | -1.2767  |
| N | 0.765995 | 2.144407 | 2.603806 | H | 0.009688 | 0.006874 | 0.805786 |
| C | 0.345456 | 3.547051 | 2.272676 | O | 0.224505 | -2.42717 | -1.58584 |
| H | -0.27342 | 3.471086 | 1.376088 | N | -1.27559 | -3.70861 | -0.37409 |
| H | -0.28886 | 3.896543 | 3.091868 | C | -0.81827 | -3.63635 | 0.81718  |
| C | 1.842205 | 2.044994 | 3.640409 | H | 0.240306 | -3.43392 | 1.016198 |
| H | 2.71308  | 2.552686 | 3.224501 | C | -1.67245 | -3.83442 | 1.986322 |
| H | 2.084226 | 0.98185  | 3.689491 | C | -3.26659 | -4.23624 | 4.273602 |
| C | 1.499424 | 4.496044 | 2.013374 | C | -1.10475 | -3.79673 | 3.263111 |
| H | 2.162277 | 4.095927 | 1.244502 | C | -3.04905 | -4.0736  | 1.859663 |
| H | 2.079487 | 4.718885 | 2.911991 | C | -3.82892 | -4.2666  | 2.9873   |
| H | 1.085516 | 5.438552 | 1.647812 | C | -1.89541 | -3.99669 | 4.391509 |
| C | 1.474063 | 2.608494 | 4.999583 | H | -0.03897 | -3.61654 | 3.366211 |
| H | 0.644698 | 2.072435 | 5.465513 | H | -3.48416 | -4.10721 | 0.866842 |
| H | 1.21894  | 3.670138 | 4.958583 | H | -4.89377 | -4.45009 | 2.87675  |
| H | 2.338294 | 2.506697 | 5.660135 | H | -1.43888 | -3.97545 | 5.376904 |
| H | 1.224397 | 1.745442 | 1.739596 | C | -0.41158 | -3.45915 | -1.43726 |
| O | 2.275754 | 1.824132 | 0.393812 | O | -0.44829 | -4.48125 | -2.28195 |
| O | 1.523563 | -0.55808 | 1.803546 | C | 0.273411 | -4.4743  | -3.56181 |
| C | 2.531597 | -1.04735 | 1.195213 | C | 1.772501 | -4.34439 | -3.32393 |
| C | 3.117612 | 1.040187 | -0.07948 | H | 2.11735  | -5.12495 | -2.64059 |
| C | 3.292407 | -0.33015 | 0.272358 | H | 2.030403 | -3.37034 | -2.91087 |
| F | 4.362573 | -0.94568 | -0.32216 | H | 2.299109 | -4.46666 | -4.27395 |
| O | 3.990611 | 1.456614 | -1.01501 | C | -0.27912 | -3.36793 | -4.45081 |
| C | 3.894588 | 2.826583 | -1.41995 | H | 0.183491 | -3.43287 | -5.4391  |
| H | 4.062173 | 3.469624 | -0.55012 | H | -0.06967 | -2.38133 | -4.03893 |
| H | 2.884275 | 3.023173 | -1.78947 | H | -1.35956 | -3.48051 | -4.57187 |
| C | 4.939389 | 3.056132 | -2.48718 | C | -0.06396 | -5.84522 | -4.13286 |
| H | 5.941203 | 2.851224 | -2.10283 | H | 0.292727 | -6.63727 | -3.47023 |
| H | 4.902665 | 4.096463 | -2.82135 | H | 0.410817 | -5.96793 | -5.10932 |
| H | 4.76409  | 2.411829 | -3.351   | H | -1.14382 | -5.95664 | -4.25419 |
| C | 2.914774 | -2.45715 | 1.544398 | H | -4.51842 | 0.719654 | 6.437271 |
| C | 3.499413 | -5.0848  | 2.345836 | N | -4.25887 | 0.948019 | 5.494178 |
| C | 3.396505 | -3.39222 | 0.620978 | C | -3.47271 | 0.168491 | 4.674526 |
| C | 2.722976 | -2.86237 | 2.871646 | C | -5.49204 | 3.120184 | 5.195318 |
| C | 3.026049 | -4.15876 | 3.274636 | H | -5.90667 | 3.174247 | 6.19688  |
| C | 3.674985 | -4.69794 | 1.019294 | C | -5.75441 | 4.10721  | 4.256959 |
| H | 3.545923 | -3.10208 | -0.41083 | H | -6.38348 | 4.947408 | 4.531269 |
| H | 2.332848 | -2.13873 | 3.579387 | C | -5.22547 | 4.036175 | 2.954324 |
| H | 2.892693 | -4.44931 | 4.312245 | H | -5.45812 | 4.822106 | 2.243856 |
| H | 4.037047 | -5.41425 | 0.288759 | C | -4.41966 | 2.978237 | 2.563201 |

|   |          |          |          |
|---|----------|----------|----------|
| H | -4.02587 | 2.933019 | 1.552016 |
| C | -4.12536 | -4.47423 | 5.483583 |
| H | -4.52147 | -5.49467 | 5.486466 |
| H | -3.56305 | -4.33353 | 6.409031 |
| H | -4.98464 | -3.79696 | 5.498808 |

## TS-II

Zero-point correction=

0.968290

Sum of electronic and thermal Enthalpies=

-3607.050207

Sum of electronic and thermal Free Energies=

-3607.230296

Imaginary frequency = 349.56i cm<sup>-1</sup>

|   |          |          |          |
|---|----------|----------|----------|
| C | -0.27811 | 0.360171 | -0.18541 |
| S | 0.014344 | 0.058683 | 1.451469 |
| N | 0.72345  | 0.639799 | -1.05166 |
| N | -1.52332 | 0.309939 | -0.72944 |
| C | 2.076702 | 0.720053 | -0.63664 |
| C | 4.761585 | 0.890207 | 0.111735 |
| C | 2.963758 | -0.29262 | -0.99158 |
| C | 2.529406 | 1.822047 | 0.08237  |
| C | 3.86847  | 1.900253 | 0.45379  |
| C | 4.300066 | -0.20308 | -0.61604 |
| H | 2.601092 | -1.14427 | -1.55214 |
| H | 1.833914 | 2.608226 | 0.348066 |
| H | 5.80322  | 0.959026 | 0.401496 |
| C | 5.27612  | -1.28385 | -0.98398 |
| C | 4.344033 | 3.066601 | 1.274081 |
| C | -2.71182 | 0.058175 | 0.058609 |
| C | -3.61876 | -0.98339 | -0.60546 |
| H | -4.23161 | -0.51833 | -1.37735 |
| H | -4.26322 | -1.43698 | 0.148095 |
| C | -3.49926 | 1.352206 | 0.332945 |
| H | -3.78637 | 1.799313 | -0.62454 |
| H | -2.80538 | 2.045425 | 0.821148 |
| C | -4.71156 | 1.143913 | 1.184204 |
| C | -4.74071 | 0.711924 | 2.558615 |
| C | -6.10193 | 0.645366 | 2.948153 |
| H | -6.42185 | 1.650592 | -0.13617 |
| F | 4.692654 | -2.30383 | -1.63872 |
| F | 5.877881 | -1.80421 | 0.105261 |
| F | 6.263894 | -0.81815 | -1.77775 |
| F | 5.652132 | 3.320141 | 1.078016 |
| F | 4.185636 | 2.844612 | 2.595389 |

|   |          |          |          |
|---|----------|----------|----------|
| F | 3.669933 | 4.195119 | 0.986355 |
| N | -2.85122 | -2.07058 | -1.28698 |
| C | -2.00559 | -2.84874 | -0.32315 |
| H | -1.36547 | -2.12214 | 0.180585 |
| H | -2.67824 | -3.27123 | 0.426996 |
| C | -3.74671 | -2.91753 | -2.14274 |
| H | -3.08906 | -3.52306 | -2.76733 |
| H | -4.26588 | -2.21815 | -2.79978 |
| C | -1.15798 | -3.91375 | -0.9921  |
| H | -0.56394 | -3.48735 | -1.80338 |
| H | -1.74901 | -4.74501 | -1.38391 |
| H | -0.46971 | -4.32124 | -0.24872 |
| C | -4.72531 | -3.78484 | -1.37595 |
| H | -5.41248 | -3.19935 | -0.76218 |
| H | -4.22374 | -4.51561 | -0.73821 |
| H | -5.3277  | -4.34105 | -2.09756 |
| H | -2.20732 | -1.61134 | -1.97098 |
| O | -1.08146 | -1.40061 | -3.34187 |
| O | -3.27519 | 0.335312 | -3.16587 |
| C | -3.25898 | 0.205945 | -4.40399 |
| C | -1.08083 | -0.9956  | -4.50763 |
| C | -1.97199 | 0.039543 | -5.06598 |
| F | -2.01452 | -0.01999 | -6.43433 |
| O | -0.26602 | -1.48303 | -5.43253 |
| C | 0.707382 | -2.44904 | -5.00591 |
| H | 0.20026  | -3.24473 | -4.45334 |
| H | 1.401604 | -1.94574 | -4.32851 |
| C | 1.39346  | -2.97333 | -6.24439 |
| H | 0.683664 | -3.48217 | -6.90071 |
| H | 2.172722 | -3.68481 | -5.95915 |
| H | 1.856487 | -2.15913 | -6.80461 |
| C | -4.54775 | 0.279189 | -5.15246 |
| C | -7.08162 | 0.354619 | -6.34349 |
| C | -4.77626 | -0.36825 | -6.37427 |
| C | -5.60687 | 0.960138 | -4.53665 |
| C | -6.86108 | 1.006892 | -5.13039 |
| C | -6.03998 | -0.33648 | -6.95738 |
| H | -3.97248 | -0.89829 | -6.86704 |
| H | -5.41893 | 1.460679 | -3.59415 |
| H | -7.66672 | 1.555208 | -4.65309 |
| H | -6.20731 | -0.84738 | -7.89966 |
| H | -8.0611  | 0.388075 | -6.80943 |
| H | -2.34574 | -0.32559 | 1.013941 |



|   |          |          |          |
|---|----------|----------|----------|
| H | 0.585884 | 0.649938 | -2.07141 |
| H | -1.66142 | 0.532068 | -1.713   |
| C | -1.06568 | 1.795351 | -4.78089 |
| O | 1.245173 | 0.752494 | -3.80524 |
| N | 0.062417 | 1.818369 | -5.50724 |
| H | -1.00282 | 1.683593 | -3.69064 |
| C | -2.10985 | 2.763229 | -5.22049 |
| C | -4.01907 | 4.678256 | -6.03774 |
| C | -2.91414 | 3.414812 | -4.28385 |
| C | -2.25759 | 3.090033 | -6.573   |
| C | -3.20344 | 4.024557 | -6.97075 |
| C | -3.85067 | 4.363838 | -4.68828 |
| H | -2.79492 | 3.192063 | -3.22785 |
| H | -1.60339 | 2.613407 | -7.2934  |
| H | -3.30411 | 4.264746 | -8.02577 |
| H | -4.45253 | 4.874152 | -3.94112 |
| C | 1.163723 | 1.323751 | -4.91091 |
| O | 2.243875 | 1.534349 | -5.69125 |
| C | 3.604597 | 1.370188 | -5.21961 |
| C | 3.912412 | -0.0941  | -4.92305 |
| H | 3.700822 | -0.70962 | -5.80146 |
| H | 3.317195 | -0.45163 | -4.08399 |
| H | 4.971827 | -0.20716 | -4.67687 |
| C | 3.859951 | 2.26486  | -4.0099  |
| H | 4.921472 | 2.23666  | -3.74829 |
| H | 3.280559 | 1.937885 | -3.14678 |
| H | 3.593066 | 3.298754 | -4.24459 |
| C | 4.430011 | 1.847808 | -6.41046 |
| H | 4.209006 | 1.244666 | -7.2945  |
| H | 5.497081 | 1.765289 | -6.18775 |
| H | 4.198624 | 2.890088 | -6.64163 |
| H | -7.85632 | 1.108966 | 1.849222 |
| N | -6.85608 | 1.016223 | 1.860377 |
| C | -6.01893 | 1.318772 | 0.810068 |
| C | -6.49358 | 0.263008 | 4.232952 |
| H | -7.53987 | 0.219799 | 4.517955 |
| C | -5.4906  | -0.05498 | 5.136545 |
| H | -5.75865 | -0.35337 | 6.144487 |
| C | -4.13197 | 0.008691 | 4.77334  |
| H | -3.37445 | -0.23957 | 5.50889  |
| C | -3.74655 | 0.389182 | 3.497391 |
| H | -2.69428 | 0.443541 | 3.233752 |
| C | -5.04638 | 5.682073 | -6.48367 |

|   |          |          |          |
|---|----------|----------|----------|
| H | -5.91271 | 5.184626 | -6.93335 |
| H | -5.40769 | 6.282861 | -5.64578 |
| H | -4.63814 | 6.363016 | -7.23567 |

### pTS-III

Zero-point correction=  
0.968862  
Sum of electronic and thermal Enthalpies=  
-3607.073525  
Sum of electronic and thermal Free Energies=  
-3607.260952

|   |          |          |          |
|---|----------|----------|----------|
| C | -3.34232 | 0.348059 | -5.52479 |
| S | -4.63821 | 1.432399 | -5.59515 |
| N | -2.69525 | -0.14301 | -6.6173  |
| N | -2.84556 | -0.13966 | -4.35886 |
| C | -2.85291 | 0.217851 | -7.95791 |
| C | -3.03191 | 0.829665 | -10.6979 |
| C | -2.69978 | -0.7842  | -8.92223 |
| C | -3.08369 | 1.533209 | -8.37502 |
| C | -3.17519 | 1.821587 | -9.73188 |
| C | -2.78934 | -0.47307 | -10.2757 |
| H | -2.52265 | -1.8068  | -8.60811 |
| H | -3.20192 | 2.31586  | -7.63942 |
| H | -3.11644 | 1.063939 | -11.751  |
| C | -2.58053 | -1.55397 | -11.2982 |
| C | -3.35604 | 3.250178 | -10.1605 |
| C | -3.57231 | -0.05952 | -3.11125 |
| H | -4.36797 | 0.671369 | -3.2687  |
| C | -2.65738 | 0.391447 | -1.97973 |
| H | -1.89994 | -0.37181 | -1.79252 |
| H | -3.25066 | 0.553833 | -1.07924 |
| C | -4.22407 | -1.41252 | -2.75946 |
| H | -3.43821 | -2.16805 | -2.66676 |
| H | -4.84197 | -1.6927  | -3.61993 |
| C | -5.0559  | -1.37643 | -1.517   |
| C | -6.25196 | -0.60441 | -1.29117 |
| C | -6.69285 | -0.88858 | 0.02611  |
| F | -1.26916 | -1.70553 | -11.5995 |
| F | -3.20919 | -1.28306 | -12.4575 |
| F | -3.01958 | -2.75092 | -10.8743 |
| F | -3.93259 | 3.350273 | -11.3721 |
| F | -2.16525 | 3.893963 | -10.2474 |
| F | -4.10755 | 3.954539 | -9.29801 |
| N | -1.9204  | 1.660847 | -2.27937 |
| C | -2.85103 | 2.810682 | -2.54064 |

|   |          |          |          |   |          |          |          |
|---|----------|----------|----------|---|----------|----------|----------|
| H | -3.44503 | 2.528649 | -3.4141  | C | 2.807374 | 1.420018 | -2.75756 |
| H | -3.52421 | 2.877048 | -1.68258 | H | 3.329651 | 1.740237 | -1.8518  |
| C | -0.88188 | 1.933303 | -1.2303  | C | 3.222973 | 0.11265  | -3.26319 |
| H | -0.24198 | 2.724477 | -1.62112 | C | 4.164241 | -2.40193 | -4.12722 |
| H | -0.27455 | 1.02775  | -1.18284 | C | 4.434579 | -0.40458 | -2.78372 |
| C | -2.13951 | 4.122848 | -2.80562 | C | 2.471589 | -0.65699 | -4.16616 |
| H | -1.41155 | 4.02249  | -3.61298 | C | 2.941627 | -1.8909  | -4.58582 |
| H | -1.63453 | 4.524168 | -1.92418 | C | 4.903349 | -1.63684 | -3.22002 |
| H | -2.88638 | 4.854975 | -3.12006 | H | 5.017284 | 0.172124 | -2.07075 |
| C | -1.4394  | 2.289576 | 0.134034 | H | 1.495855 | -0.32935 | -4.50656 |
| H | -2.0395  | 1.486615 | 0.566098 | H | 2.334918 | -2.48572 | -5.26009 |
| H | -2.03991 | 3.201569 | 0.116466 | H | 5.848333 | -2.01616 | -2.8437  |
| H | -0.59911 | 2.467733 | 0.808987 | C | 4.639753 | -3.74888 | -4.58791 |
| H | -2.04187 | -0.92482 | -6.42475 | H | 5.578943 | -4.02963 | -4.10758 |
| O | -0.96599 | -1.87737 | -5.48323 | H | 4.795622 | -3.7582  | -5.671   |
| C | -0.54764 | -3.07628 | -5.35639 | H | 3.894524 | -4.51782 | -4.36476 |
| C | -0.1884  | -3.63817 | -4.13395 | O | 0.002055 | 1.906139 | -4.37317 |
| C | -0.25083 | -3.00445 | -2.85548 | O | 1.941297 | 2.468762 | -5.41047 |
| O | -0.74533 | -1.90035 | -2.60792 | C | 1.37919  | 2.610248 | -6.7694  |
| H | -2.08697 | -0.83798 | -4.42682 | C | 0.300462 | 3.685246 | -6.77789 |
| F | 0.380146 | -4.88912 | -4.13355 | H | 0.01198  | 3.893351 | -7.81124 |
| O | 0.309623 | -3.76129 | -1.87751 | H | 0.680678 | 4.612296 | -6.34017 |
| C | 0.310989 | -3.19834 | -0.56957 | H | -0.58711 | 3.366943 | -6.23209 |
| H | 0.856818 | -2.24897 | -0.58264 | C | 2.592383 | 3.054625 | -7.57424 |
| H | -0.71775 | -2.98088 | -0.26279 | H | 2.312903 | 3.177906 | -8.62315 |
| C | 0.964735 | -4.20003 | 0.35569  | H | 3.388965 | 2.309788 | -7.51232 |
| H | 1.990428 | -4.40646 | 0.041716 | H | 2.977715 | 4.007093 | -7.20275 |
| H | 0.413614 | -5.14324 | 0.360192 | C | 0.86873  | 1.260493 | -7.25085 |
| H | 0.988229 | -3.80775 | 1.376328 | H | 0.53291  | 1.353597 | -8.28688 |
| C | -0.38471 | -3.88036 | -6.61182 | H | 0.03169  | 0.909006 | -6.64817 |
| C | -0.1345  | -5.24793 | -9.0483  | H | 1.669086 | 0.516963 | -7.21857 |
| C | 0.053211 | -3.21563 | -7.76374 | H | -5.88684 | -2.21176 | 1.47459  |
| C | -0.70316 | -5.24037 | -6.69905 | C | -7.00021 | 0.284922 | -2.08072 |
| C | -0.58785 | -5.91438 | -7.91173 | H | -6.70008 | 0.512816 | -3.09919 |
| C | 0.190285 | -3.89472 | -8.97026 | C | -7.8411  | -0.31039 | 0.571568 |
| H | 0.285425 | -2.15783 | -7.69793 | H | -8.16763 | -0.5408  | 1.580652 |
| H | -1.05112 | -5.76766 | -5.81929 | C | -8.55581 | 0.567482 | -0.2299  |
| H | -0.85433 | -6.96489 | -7.96853 | H | -9.45489 | 1.032126 | 0.16082  |
| H | 0.538292 | -3.36693 | -9.85199 | C | -4.83119 | -2.07836 | -0.36105 |
| H | -0.04181 | -5.77703 | -9.9911  | H | -4.0452  | -2.78376 | -0.13261 |
| H | -1.37051 | 1.517766 | -3.14853 | N | -5.80413 | -1.78529 | 0.568847 |
| N | 1.935676 | 2.246739 | -3.19123 | C | -8.14077 | 0.860729 | -1.54263 |
| C | 1.204847 | 2.14107  | -4.361   | H | -8.7291  | 1.544875 | -2.14467 |

### TS-III

Zero-point correction=

0.968333

Sum of electronic and thermal Enthalpies=

-3607.049714

Sum of electronic and thermal Free Energies=

-3607.228635

Imaginary frequency = 125.52i cm<sup>-1</sup>

|   |          |          |          |
|---|----------|----------|----------|
| C | 0.044883 | 0.104719 | -0.24298 |
| S | 0.069841 | 0.354834 | 1.429295 |
| N | 1.13767  | 0.162757 | -1.04833 |
| N | -1.10073 | -0.16527 | -0.91505 |
| C | 2.478723 | 0.322043 | -0.67632 |
| C | 5.215921 | 0.634946 | -0.11972 |
| C | 3.300746 | 1.049031 | -1.54275 |
| C | 3.037155 | -0.26499 | 0.462469 |
| C | 4.392244 | -0.09773 | 0.729367 |
| C | 4.65419  | 1.198031 | -1.26119 |
| H | 2.86871  | 1.482593 | -2.43669 |
| H | 2.416522 | -0.84469 | 1.130221 |
| H | 6.268483 | 0.758251 | 0.098949 |
| C | 5.526198 | 1.935857 | -2.23604 |
| C | 4.962877 | -0.69821 | 1.982999 |
| C | -2.40913 | -0.14872 | -0.30323 |
| H | -2.25037 | -0.23837 | 0.774305 |
| C | -3.25029 | -1.31487 | -0.80682 |
| H | -3.47704 | -1.1897  | -1.869   |
| H | -4.18496 | -1.34027 | -0.24586 |
| C | -3.14243 | 1.185227 | -0.55489 |
| H | -3.23605 | 1.34839  | -1.63411 |
| H | -2.48465 | 1.971766 | -0.17057 |
| C | -4.48747 | 1.272842 | 0.092827 |
| C | -4.77258 | 1.256237 | 1.505177 |
| C | -6.17939 | 1.35338  | 1.64961  |
| H | -5.91458 | 1.446394 | -1.59812 |
| F | 5.943308 | 1.130894 | -3.24057 |
| F | 6.634703 | 2.430593 | -1.65471 |
| F | 4.883531 | 2.967642 | -2.81411 |
| F | 4.780244 | 0.102095 | 3.05429  |
| F | 6.288894 | -0.91475 | 1.884081 |
| F | 4.389974 | -1.88074 | 2.283643 |
| N | -2.58285 | -2.64718 | -0.69085 |
| C | -2.01304 | -2.90724 | 0.669019 |
| H | -1.31331 | -2.09548 | 0.875315 |
| H | -2.82891 | -2.83228 | 1.392702 |

|   |          |          |          |
|---|----------|----------|----------|
| C | -3.48478 | -3.7358  | -1.18972 |
| H | -2.85443 | -4.61256 | -1.34122 |
| H | -3.8198  | -3.41203 | -2.17742 |
| C | -1.28985 | -4.23798 | 0.763211 |
| H | -0.53522 | -4.33337 | -0.02094 |
| H | -1.96213 | -5.09747 | 0.711812 |
| H | -0.77586 | -4.28071 | 1.725608 |
| C | -4.66418 | -4.06018 | -0.29219 |
| H | -5.32284 | -3.2043  | -0.13278 |
| H | -4.3521  | -4.4421  | 0.681983 |
| H | -5.25703 | -4.84123 | -0.77353 |
| H | 0.988107 | 0.194987 | -2.06847 |
| O | 1.392511 | -0.04764 | -3.82853 |
| C | 1.066898 | 0.268776 | -4.9931  |
| C | -0.08194 | 1.081529 | -5.2423  |
| C | -0.59351 | 2.137608 | -4.36931 |
| O | -1.46048 | 2.920108 | -4.72574 |
| H | -1.07029 | -0.36375 | -1.92677 |
| F | -0.35258 | 1.393194 | -6.54454 |
| O | -0.04706 | 2.162272 | -3.13652 |
| C | -0.43196 | 3.267078 | -2.29768 |
| H | -1.5004  | 3.454269 | -2.42089 |
| H | -0.23634 | 2.915753 | -1.28326 |
| C | 0.376352 | 4.508766 | -2.61287 |
| H | 0.168861 | 4.860408 | -3.62511 |
| H | 1.446861 | 4.313164 | -2.51575 |
| H | 0.111145 | 5.305711 | -1.91213 |
| C | 1.927979 | -0.21549 | -6.12259 |
| C | 3.723654 | -1.11942 | -8.08206 |
| C | 3.275318 | -0.44646 | -5.81087 |
| C | 1.489986 | -0.4543  | -7.4318  |
| C | 2.383181 | -0.91104 | -8.39807 |
| C | 4.168491 | -0.88334 | -6.78191 |
| H | 3.609483 | -0.27255 | -4.79473 |
| H | 0.452803 | -0.30355 | -7.69686 |
| H | 2.026595 | -1.1021  | -9.40514 |
| H | 5.211031 | -1.03782 | -6.5237  |
| H | 4.417169 | -1.46279 | -8.84295 |
| H | -1.77294 | -2.66404 | -1.39076 |
| C | -1.8154  | -0.48693 | -4.64886 |
| N | -1.39761 | -1.21164 | -3.61983 |
| C | -0.7221  | -2.38601 | -3.58674 |
| O | -0.74219 | -3.07812 | -2.54747 |

|   |          |          |          |
|---|----------|----------|----------|
| O | -0.02148 | -2.74578 | -4.65624 |
| C | 0.865989 | -3.92537 | -4.65395 |
| C | 1.970771 | -3.7328  | -3.62357 |
| H | 2.717118 | -4.52259 | -3.74673 |
| H | 1.581227 | -3.7769  | -2.60684 |
| H | 2.45871  | -2.76775 | -3.77377 |
| C | 0.059753 | -5.1994  | -4.42073 |
| H | 0.715818 | -6.0628  | -4.56171 |
| H | -0.7553  | -5.2797  | -5.1462  |
| H | -0.35301 | -5.23579 | -3.41378 |
| C | 1.439024 | -3.92036 | -6.06432 |
| H | 2.101399 | -4.78042 | -6.19059 |
| H | 2.009971 | -3.01065 | -6.25125 |
| H | 0.641887 | -3.98666 | -6.80877 |
| N | -6.71558 | 1.422048 | 0.385875 |
| C | -5.69855 | 1.380799 | -0.5412  |
| H | -7.68836 | 1.553826 | 0.172052 |
| C | -6.80231 | 1.372981 | 2.899486 |
| H | -7.88053 | 1.451066 | 2.995037 |
| C | -5.98739 | 1.296232 | 4.019111 |
| H | -6.43769 | 1.312727 | 5.005907 |
| C | -4.58751 | 1.206106 | 3.900002 |
| H | -3.98097 | 1.15856  | 4.798    |
| C | -3.97229 | 1.186654 | 2.657998 |
| H | -2.89024 | 1.131512 | 2.580664 |
| C | -2.28438 | -0.8751  | -5.98841 |
| C | -2.28076 | -2.17616 | -6.51449 |
| C | -2.88577 | 0.139804 | -6.75286 |
| C | -2.84388 | -2.43881 | -7.75582 |
| H | -1.84031 | -2.98626 | -5.95176 |
| C | -3.43376 | -0.12928 | -7.99926 |
| H | -2.90845 | 1.152767 | -6.36342 |
| C | -3.42127 | -1.42335 | -8.5276  |
| H | -2.83704 | -3.45673 | -8.13562 |
| H | -3.88285 | 0.678993 | -8.56862 |
| C | -3.99175 | -1.7142  | -9.88666 |
| H | -4.42506 | -2.71638 | -9.93316 |
| H | -4.76651 | -0.99335 | -10.1573 |
| H | -3.21224 | -1.66014 | -10.6546 |
| H | -2.28237 | 0.442957 | -4.33254 |

pTS-IV

Zero-point correction=  
0.968761  
Sum of electronic and thermal Enthalpies=  
-3607.081735  
Sum of electronic and thermal Free Energies=  
-3607.268409

|   |          |          |          |
|---|----------|----------|----------|
| C | -3.06756 | 0.192117 | -5.23788 |
| S | -4.32612 | 1.296557 | -5.46354 |
| N | -2.31036 | -0.36224 | -6.22742 |
| N | -2.68085 | -0.21961 | -4.00746 |
| C | -2.2889  | -0.15534 | -7.60842 |
| C | -2.03848 | 0.122216 | -10.4036 |
| C | -1.15108 | -0.62842 | -8.27917 |
| C | -3.31118 | 0.444601 | -8.35437 |
| C | -3.16866 | 0.576963 | -9.73218 |
| C | -1.03512 | -0.48625 | -9.65617 |
| H | -0.36502 | -1.10838 | -7.70565 |
| H | -4.19878 | 0.803569 | -7.85427 |
| H | -1.94359 | 0.234084 | -11.4759 |
| C | 0.178786 | -1.0411  | -10.3447 |
| C | -4.24582 | 1.276541 | -10.5146 |
| C | -3.47085 | -0.03748 | -2.80885 |
| H | -4.25781 | 0.677186 | -3.0552  |
| C | -2.59255 | 0.490008 | -1.68242 |
| H | -1.77714 | -0.21862 | -1.51124 |
| H | -3.18883 | 0.600968 | -0.7764  |
| C | -4.13482 | -1.36642 | -2.38839 |
| H | -3.35442 | -2.1181  | -2.24084 |
| H | -4.73969 | -1.69469 | -3.24099 |
| C | -4.97731 | -1.26664 | -1.15753 |
| C | -6.18804 | -0.50571 | -0.98373 |
| C | -6.62585 | -0.71417 | 0.349104 |
| F | 1.29813  | -0.87623 | -9.61137 |
| F | 0.397316 | -0.46171 | -11.5388 |
| F | 0.064141 | -2.36916 | -10.5731 |
| F | -4.38479 | 0.759112 | -11.7517 |
| F | -3.96651 | 2.589835 | -10.6784 |
| F | -5.44519 | 1.206041 | -9.91555 |
| N | -1.96488 | 1.816863 | -1.98368 |
| C | -2.99444 | 2.893943 | -2.18255 |
| H | -3.56612 | 2.597234 | -3.06503 |
| H | -3.66036 | 2.865176 | -1.31693 |
| C | -0.90638 | 2.149907 | -0.97284 |
| H | -0.38069 | 3.024436 | -1.35564 |
| H | -0.20224 | 1.316792 | -1.00087 |

|   |          |          |          |   |          |          |          |
|---|----------|----------|----------|---|----------|----------|----------|
| C | -2.40619 | 4.27445  | -2.39984 | H | 2.004579 | 4.199624 | -8.17793 |
| H | -1.68169 | 4.26744  | -3.21592 | H | 2.412903 | 2.502322 | -7.87081 |
| H | -1.932   | 4.68499  | -1.50559 | H | 3.166426 | 3.7829   | -6.90273 |
| H | -3.219   | 4.948022 | -2.67982 | C | -0.17518 | 2.899179 | -7.07631 |
| C | -1.42749 | 2.385311 | 0.431247 | H | -0.45167 | 3.599708 | -7.86895 |
| H | -1.8961  | 1.496596 | 0.857466 | H | -1.00637 | 2.824553 | -6.37626 |
| H | -2.13998 | 3.211895 | 0.479587 | H | -0.01029 | 1.922953 | -7.53678 |
| H | -0.58141 | 2.646343 | 1.07095  | H | -5.7911  | -1.92087 | 1.881376 |
| H | -1.59032 | -1.02349 | -5.90912 | C | -6.9516  | 0.317791 | -1.82778 |
| O | -0.27072 | -2.21108 | -5.57868 | H | -6.65411 | 0.485375 | -2.85857 |
| C | -0.17342 | -3.36816 | -5.13172 | C | -7.78552 | -0.12387 | 0.855732 |
| C | -0.35589 | -3.7638  | -3.77437 | H | -8.10968 | -0.2962  | 1.8771   |
| C | -0.60538 | -2.92124 | -2.68896 | C | -8.51524 | 0.688444 | 0.000142 |
| O | -0.68045 | -1.6558  | -2.77851 | H | -9.42346 | 1.159947 | 0.360244 |
| H | -1.8728  | -0.8522  | -3.88809 | C | -4.7393  | -1.88954 | 0.040919 |
| F | -0.20527 | -5.10655 | -3.5346  | H | -3.93576 | -2.55919 | 0.314465 |
| H | -1.43548 | 1.746732 | -2.87821 | N | -5.72073 | -1.55745 | 0.94746  |
| N | 1.699819 | 1.296889 | -3.49659 | C | -8.10369 | 0.90565  | -1.32833 |
| C | 0.911438 | 2.015499 | -4.36709 | H | -8.70393 | 1.539136 | -1.97264 |
| C | 1.855256 | 0.028993 | -3.56443 | O | 0.146698 | -4.40294 | -5.93315 |
| H | 1.3307   | -0.5804  | -4.30643 | C | 0.326238 | -4.1142  | -7.32267 |
| C | 2.741291 | -0.68309 | -2.64659 | H | -0.60489 | -3.70764 | -7.72839 |
| C | 4.457721 | -2.10977 | -0.9286  | H | 1.103107 | -3.35242 | -7.43682 |
| C | 2.826496 | -2.0769  | -2.72299 | C | 0.708523 | -5.405   | -8.00864 |
| C | 3.524882 | -0.00491 | -1.70263 | H | 1.63807  | -5.80498 | -7.59712 |
| C | 4.366904 | -0.71142 | -0.85817 | H | -0.07329 | -6.15782 | -7.88546 |
| C | 3.671537 | -2.77843 | -1.87116 | H | 0.851306 | -5.22513 | -9.07714 |
| H | 2.210133 | -2.61299 | -3.43746 | C | -0.78244 | -3.51208 | -1.31742 |
| H | 3.465688 | 1.077109 | -1.65045 | C | -0.28328 | -2.78917 | -0.22697 |
| H | 4.971442 | -0.17562 | -0.13192 | C | -1.49094 | -4.69421 | -1.07296 |
| H | 3.714823 | -3.86123 | -1.93606 | C | -0.46785 | -3.24401 | 1.07466  |
| C | 5.398406 | -2.86519 | -0.03323 | H | 0.261836 | -1.87171 | -0.42031 |
| H | 5.035219 | -3.87621 | 0.163925 | C | -1.6967  | -5.13745 | 0.231846 |
| H | 5.535113 | -2.35683 | 0.924184 | H | -1.88675 | -5.26496 | -1.90401 |
| H | 6.385851 | -2.95657 | -0.49881 | C | -1.18118 | -4.4195  | 1.309347 |
| O | -0.24078 | 2.355551 | -4.10882 | H | -0.05314 | -2.68406 | 1.907266 |
| O | 1.593741 | 2.386942 | -5.43879 | H | -2.25623 | -6.05121 | 0.405042 |
| C | 1.096549 | 3.389414 | -6.40086 | H | -1.32908 | -4.776   | 2.323878 |
| C | 0.903985 | 4.719384 | -5.68399 |   |          |          |          |
| H | 0.657968 | 5.490643 | -6.41839 |   |          |          |          |
| H | 1.82258  | 5.017305 | -5.17173 |   |          |          |          |
| H | 0.090776 | 4.666123 | -4.96006 |   |          |          |          |
| C | 2.243727 | 3.472397 | -7.39838 |   |          |          |          |

## TS-IV

Zero-point correction=  
 0.968070  
 Sum of electronic and thermal Enthalpies=  
 -3607.069904  
 Sum of electronic and thermal Free Energies=  
 -3607.250473  
 Imaginary frequency = 235.20i cm<sup>-1</sup>

|   |          |          |          |
|---|----------|----------|----------|
| C | -0.00011 | 0.146003 | 0.2451   |
| S | -0.08747 | -0.0403  | 1.919891 |
| N | 1.156456 | 0.285706 | -0.46755 |
| N | -1.09292 | 0.132195 | -0.55059 |
| C | 2.487129 | 0.355179 | -0.05303 |
| C | 5.237247 | 0.515768 | 0.546799 |
| C | 3.452612 | 0.050737 | -1.02019 |
| C | 2.911107 | 0.760599 | 1.21874  |
| C | 4.27168  | 0.829151 | 1.499015 |
| C | 4.806573 | 0.13246  | -0.71835 |
| H | 3.126366 | -0.24732 | -2.01015 |
| H | 2.180654 | 1.012023 | 1.973652 |
| H | 6.291499 | 0.575577 | 0.781587 |
| C | 5.800958 | -0.17016 | -1.80117 |
| C | 4.706128 | 1.212235 | 2.887053 |
| C | -2.44862 | 0.168184 | -0.04772 |
| H | -2.39351 | -0.10388 | 1.00716  |
| C | -3.32557 | -0.81822 | -0.80599 |
| H | -3.29535 | -0.5955  | -1.8758  |
| H | -4.34861 | -0.7222  | -0.43916 |
| C | -3.03268 | 1.595806 | -0.12844 |
| H | -3.05112 | 1.914525 | -1.17434 |
| H | -2.31882 | 2.245482 | 0.390359 |
| C | -4.3877  | 1.72727  | 0.490325 |
| C | -4.73372 | 1.530402 | 1.875863 |
| C | -6.12729 | 1.760259 | 1.998479 |
| F | 5.500795 | -1.31231 | -2.4579  |
| F | 7.052391 | -0.30087 | -1.33236 |
| F | 5.832985 | 0.803937 | -2.73984 |
| F | 5.930871 | 1.774748 | 2.894666 |
| F | 4.77034  | 0.137694 | 3.702926 |
| F | 3.862821 | 2.086711 | 3.462259 |
| N | -2.91337 | -2.24999 | -0.67333 |
| C | -2.69273 | -2.67197 | 0.746293 |
| H | -1.88391 | -2.04854 | 1.132664 |
| H | -3.59761 | -2.43258 | 1.311643 |
| C | -3.84742 | -3.14074 | -1.43475 |

|   |          |          |          |
|---|----------|----------|----------|
| H | -3.36834 | -4.11954 | -1.47502 |
| H | -3.84527 | -2.75383 | -2.45512 |
| C | -2.30788 | -4.13316 | 0.888257 |
| H | -1.45603 | -4.37815 | 0.250341 |
| H | -3.12832 | -4.81825 | 0.662965 |
| H | -2.00948 | -4.30719 | 1.92426  |
| C | -5.24999 | -3.24683 | -0.86639 |
| H | -5.77936 | -2.29209 | -0.8631  |
| H | -5.2615  | -3.64961 | 0.149074 |
| H | -5.82269 | -3.93242 | -1.49545 |
| H | 1.044555 | 0.238159 | -1.48084 |
| C | -1.49632 | -1.61256 | -5.05787 |
| C | -0.69299 | -2.73433 | -3.19108 |
| N | -1.65332 | -1.99958 | -3.7929  |
| H | -1.98515 | -2.38826 | -1.18919 |
| C | -0.65873 | 0.42121  | -5.10336 |
| F | -0.60697 | 0.6472   | -6.45493 |
| H | -0.99568 | 0.320608 | -1.55389 |
| O | -1.81796 | 0.988682 | -3.15455 |
| C | -1.66592 | 1.159979 | -4.37381 |
| C | 0.65435  | 0.168165 | -4.52778 |
| O | 0.896063 | 0.030738 | -3.33205 |
| H | -0.61562 | -1.92528 | -5.62102 |
| C | -2.69442 | -1.38455 | -5.88707 |
| C | -4.97845 | -1.06117 | -7.5232  |
| C | -2.58335 | -1.37439 | -7.28173 |
| C | -3.96695 | -1.23912 | -5.32253 |
| C | -5.08601 | -1.07989 | -6.12743 |
| C | -3.70787 | -1.21725 | -8.08385 |
| H | -1.60723 | -1.49432 | -7.7399  |
| H | -4.06229 | -1.25686 | -4.24332 |
| H | -6.06458 | -0.96752 | -5.66851 |
| H | -3.59673 | -1.21707 | -9.16425 |
| C | -6.18932 | -0.85273 | -8.38893 |
| H | -6.05705 | -1.30085 | -9.37645 |
| H | -6.38144 | 0.215744 | -8.53655 |
| H | -7.08476 | -1.28583 | -7.93607 |
| O | -0.73916 | -3.00937 | -1.97637 |
| O | 0.274868 | -3.23005 | -3.98126 |
| C | 1.244729 | -4.22314 | -3.51927 |
| C | 0.520033 | -5.49095 | -3.07892 |
| H | 1.253933 | -6.2742  | -2.87029 |
| H | -0.14109 | -5.84748 | -3.87357 |

|   |          |          |          |
|---|----------|----------|----------|
| H | -0.06667 | -5.31641 | -2.17749 |
| C | 2.064463 | -4.4954  | -4.77522 |
| H | 2.841212 | -5.23379 | -4.56186 |
| H | 2.546753 | -3.58097 | -5.12808 |
| H | 1.428442 | -4.88089 | -5.57589 |
| C | 2.127666 | -3.65273 | -2.4162  |
| H | 2.918658 | -4.36954 | -2.17908 |
| H | 1.554062 | -3.44722 | -1.51366 |
| H | 2.601095 | -2.72682 | -2.74848 |
| H | -7.54348 | 2.34575  | 0.532272 |
| C | -3.99556 | 1.200514 | 3.025007 |
| H | -2.92337 | 1.03614  | 2.968538 |
| C | -6.7969  | 1.661254 | 3.220082 |
| H | -7.86403 | 1.843054 | 3.298541 |
| C | -6.04308 | 1.327571 | 4.335478 |
| H | -6.53057 | 1.245351 | 5.301145 |
| C | -5.55333 | 2.064045 | -0.14833 |
| H | -5.71614 | 2.31277  | -1.18715 |
| N | -6.59945 | 2.078509 | 0.747769 |
| C | -4.65685 | 1.101878 | 4.239426 |
| H | -4.09691 | 0.852844 | 5.134486 |
| O | 1.59929  | 0.06384  | -5.47377 |
| C | 2.944271 | -0.14651 | -5.0238  |
| H | 3.232014 | 0.681824 | -4.37063 |
| H | 2.983883 | -1.06973 | -4.43973 |
| C | 3.828371 | -0.22096 | -6.24587 |
| H | 3.532884 | -1.04937 | -6.89381 |
| H | 3.773432 | 0.704442 | -6.82325 |
| H | 4.865374 | -0.37472 | -5.9376  |
| C | -2.59675 | 2.100701 | -5.0813  |
| C | -3.86606 | 2.285429 | -4.51972 |
| C | -2.23224 | 2.873907 | -6.19    |
| C | -4.76048 | 3.198684 | -5.06216 |
| H | -4.1339  | 1.697281 | -3.64965 |
| C | -3.12132 | 3.80564  | -6.72005 |
| H | -1.25201 | 2.761261 | -6.63339 |
| C | -4.38855 | 3.965268 | -6.16611 |
| H | -5.74606 | 3.319843 | -4.62389 |
| H | -2.82026 | 4.407865 | -7.57085 |
| H | -5.08106 | 4.68645  | -6.58798 |

PC-I

Zero-point correction=  
0.968834  
Sum of electronic and thermal Enthalpies=  
-3607.086763  
Sum of electronic and thermal Free Energies=  
-3607.268682

|   |          |          |          |
|---|----------|----------|----------|
| C | -0.32546 | 0.310026 | -0.13817 |
| S | -0.49272 | 0.572509 | 1.517888 |
| N | 0.874406 | 0.2953   | -0.79567 |
| N | -1.37578 | 0.117571 | -0.96404 |
| C | 2.17479  | 0.367647 | -0.29151 |
| C | 4.864236 | 0.493282 | 0.527128 |
| C | 3.147198 | 0.94085  | -1.11887 |
| C | 2.559701 | -0.15395 | 0.948201 |
| C | 3.890893 | -0.07615 | 1.342816 |
| C | 4.475339 | 0.994882 | -0.71036 |
| H | 2.857206 | 1.358363 | -2.07676 |
| H | 1.819111 | -0.60028 | 1.595886 |
| H | 5.895044 | 0.552636 | 0.851253 |
| C | 5.507338 | 1.564384 | -1.64069 |
| C | 4.295667 | -0.69124 | 2.654202 |
| C | -2.75804 | 0.211797 | -0.54501 |
| H | -2.75363 | 0.148026 | 0.544343 |
| C | -3.5682  | -0.92606 | -1.14845 |
| H | -3.47848 | -0.89909 | -2.23756 |
| H | -4.61203 | -0.79279 | -0.85789 |
| C | -3.36439 | 1.580918 | -0.92434 |
| H | -3.35197 | 1.68893  | -2.01192 |
| H | -2.68575 | 2.338605 | -0.51698 |
| C | -4.74581 | 1.796234 | -0.39324 |
| C | -5.13633 | 1.910333 | 0.989325 |
| C | -6.54012 | 2.104949 | 1.015996 |
| H | -6.03034 | 1.911791 | -2.19817 |
| F | 5.995603 | 0.618613 | -2.47921 |
| F | 6.563149 | 2.073072 | -0.98181 |
| F | 5.009649 | 2.543159 | -2.41871 |
| F | 5.398609 | -0.1121  | 3.166055 |
| F | 4.579974 | -2.00652 | 2.515358 |
| F | 3.328123 | -0.60129 | 3.581094 |
| N | -3.12694 | -2.29232 | -0.74587 |
| C | -3.00337 | -2.4594  | 0.731234 |
| H | -2.2517  | -1.74132 | 1.063928 |
| H | -3.95549 | -2.17863 | 1.191819 |
| C | -3.97675 | -3.32833 | -1.40822 |
| H | -3.46488 | -4.28123 | -1.26604 |

|   |          |          |          |   |          |          |          |
|---|----------|----------|----------|---|----------|----------|----------|
| H | -3.92299 | -3.10509 | -2.47582 | C | -2.74192 | -2.9252  | -7.03574 |
| C | -2.56944 | -3.8548  | 1.144788 | C | -4.04419 | -1.93771 | -5.28755 |
| H | -1.66108 | -4.1535  | 0.617018 | C | -5.20924 | -2.24451 | -5.98518 |
| H | -3.34025 | -4.61032 | 0.976226 | C | -3.90756 | -3.23626 | -7.72971 |
| H | -2.34837 | -3.84413 | 2.214352 | H | -1.77907 | -3.19324 | -7.45973 |
| C | -5.41227 | -3.40908 | -0.92062 | H | -4.10109 | -1.43677 | -4.32822 |
| H | -5.97008 | -2.48653 | -1.09476 | H | -6.17279 | -1.97217 | -5.56177 |
| H | -5.48078 | -3.65481 | 0.141983 | H | -3.83805 | -3.74835 | -8.68553 |
| H | -5.91998 | -4.20368 | -1.47278 | C | -6.4241  | -3.26915 | -7.95383 |
| H | 0.81836  | 0.282121 | -1.81059 | H | -6.29999 | -3.16395 | -9.03476 |
| O | 0.291885 | 0.056154 | -3.62138 | H | -7.26327 | -2.64014 | -7.64712 |
| C | 0.296844 | -0.12817 | -4.82925 | H | -6.70544 | -4.30975 | -7.75887 |
| C | -1.02702 | -0.48883 | -5.50395 | O | -0.89446 | -3.03652 | -1.73456 |
| C | -2.07395 | 0.582579 | -5.21026 | O | 0.26051  | -3.33785 | -3.66412 |
| O | -2.46736 | 0.843567 | -4.09631 | C | 1.154025 | -4.33877 | -3.10244 |
| H | -1.20974 | -0.04489 | -1.95751 | C | 0.37014  | -5.5713  | -2.65953 |
| F | -0.84384 | -0.57912 | -6.87388 | H | 1.066354 | -6.3683  | -2.38327 |
| O | -2.48757 | 1.190057 | -6.31793 | H | -0.25618 | -5.9358  | -3.47878 |
| C | -3.51077 | 2.188707 | -6.14495 | H | -0.26287 | -5.3449  | -1.80215 |
| H | -4.3865  | 1.708188 | -5.70056 | C | 2.052296 | -4.68911 | -4.28484 |
| H | -3.14676 | 2.944572 | -5.44413 | H | 2.795025 | -5.43314 | -3.98563 |
| C | -3.81242 | 2.767603 | -7.50585 | H | 2.576972 | -3.8017  | -4.64706 |
| H | -4.16219 | 1.992215 | -8.1906  | H | 1.462508 | -5.1001  | -5.10826 |
| H | -2.92552 | 3.236655 | -7.93745 | C | 1.982301 | -3.75124 | -1.96389 |
| H | -4.59274 | 3.527759 | -7.41633 | H | 2.711256 | -4.49029 | -1.61875 |
| C | 1.573567 | -0.05599 | -5.59237 | H | 1.34595  | -3.4618  | -1.12897 |
| C | 4.081884 | 0.182903 | -6.80474 | H | 2.533649 | -2.87221 | -2.3083  |
| C | 2.734399 | -0.4543  | -4.91372 | N | -6.97601 | 2.106052 | -0.28739 |
| C | 1.684201 | 0.470747 | -6.88638 | C | -5.89746 | 1.926022 | -1.12583 |
| C | 2.936732 | 0.598741 | -7.47921 | H | -7.92222 | 2.264023 | -0.58506 |
| C | 3.978723 | -0.34887 | -5.51967 | C | -7.25038 | 2.262296 | 2.208187 |
| H | 2.643192 | -0.85828 | -3.9123  | H | -8.32522 | 2.412945 | 2.212909 |
| H | 0.802976 | 0.796344 | -7.42177 | C | -6.52676 | 2.22417  | 3.390848 |
| H | 3.015627 | 1.023295 | -8.47419 | H | -7.04606 | 2.345379 | 4.335643 |
| H | 4.867349 | -0.66981 | -4.98764 | C | -5.13127 | 2.037437 | 3.388372 |
| H | 5.054407 | 0.276092 | -7.2765  | H | -4.59716 | 2.019956 | 4.332358 |
| H | -2.11992 | -2.49761 | -1.18682 | C | -4.42958 | 1.881402 | 2.203091 |
| C | -1.50713 | -1.94346 | -5.05231 | H | -3.35203 | 1.745378 | 2.213899 |
| N | -1.66283 | -2.08323 | -3.64313 |   |          |          |          |
| C | -0.79588 | -2.80979 | -2.98188 |   |          |          |          |
| H | -0.71455 | -2.57943 | -5.46402 |   |          |          |          |
| C | -2.78997 | -2.27102 | -5.80327 |   |          |          |          |
| C | -5.16439 | -2.90247 | -7.21781 |   |          |          |          |

**PC-II**

Zero-point correction=  
0.969779



Sum of electronic and thermal Enthalpies=  
-3607.062329  
Sum of electronic and thermal Free Energies=  
-3607.245188

|   |          |          |          |
|---|----------|----------|----------|
| C | 0.524063 | 0.003836 | -0.17391 |
| S | 0.622647 | -0.44831 | 1.45029  |
| N | 1.599575 | 0.049983 | -1.00218 |
| N | -0.64086 | 0.306619 | -0.80475 |
| C | 2.92344  | -0.27462 | -0.64845 |
| C | 5.591491 | -0.90233 | -0.0637  |
| C | 3.613421 | -1.20542 | -1.42017 |
| C | 3.572583 | 0.351033 | 0.418845 |
| C | 4.894009 | 0.029706 | 0.703553 |
| C | 4.94185  | -1.511   | -1.12951 |
| H | 3.106842 | -1.69986 | -2.24024 |
| H | 3.044249 | 1.084646 | 1.012027 |
| H | 6.621877 | -1.1436  | 0.164754 |
| C | 5.678835 | -2.47844 | -2.01039 |
| C | 5.578024 | 0.66828  | 1.880525 |
| C | -1.88594 | 0.511743 | -0.09789 |
| C | -3.04362 | -0.25351 | -0.73956 |
| H | -3.33942 | 0.187275 | -1.69484 |
| H | -3.89887 | -0.2272  | -0.06424 |
| C | -2.22612 | 2.012769 | 0.002371 |
| H | -2.28747 | 2.438026 | -1.00553 |
| H | -1.37038 | 2.489994 | 0.493019 |
| C | -3.48708 | 2.303412 | 0.752093 |
| C | -3.77413 | 1.996993 | 2.130745 |
| C | -5.08943 | 2.456596 | 2.395134 |
| H | -4.78063 | 3.326896 | -0.73115 |
| F | 4.87973  | -3.47806 | -2.43788 |
| F | 6.725401 | -3.0435  | -1.3847  |
| F | 6.163256 | -1.87657 | -3.1183  |
| F | 6.895258 | 0.845877 | 1.657777 |
| F | 5.473211 | -0.09154 | 2.990637 |
| F | 5.057406 | 1.870985 | 2.178796 |
| N | -2.73351 | -1.68833 | -1.05369 |
| C | -2.11094 | -2.43795 | 0.084591 |
| H | -1.23962 | -1.87058 | 0.415214 |
| H | -2.8321  | -2.43436 | 0.904639 |
| C | -3.93595 | -2.38631 | -1.63546 |
| H | -3.56055 | -3.29321 | -2.11137 |
| H | -4.30094 | -1.73337 | -2.42679 |
| C | -1.69142 | -3.84413 | -0.29773 |

|   |          |          |          |
|---|----------|----------|----------|
| H | -1.04002 | -3.83955 | -1.176   |
| H | -2.53428 | -4.51128 | -0.49035 |
| H | -1.11797 | -4.26539 | 0.530369 |
| C | -5.02514 | -2.71173 | -0.63201 |
| H | -5.39999 | -1.82646 | -0.11434 |
| H | -4.71335 | -3.44495 | 0.114691 |
| H | -5.86591 | -3.14249 | -1.1804  |
| H | -2.05596 | -1.64176 | -1.83378 |
| O | -1.47281 | -1.43321 | -3.58474 |
| O | -4.15955 | -0.34606 | -3.97257 |
| C | -3.6799  | -0.34058 | -5.09701 |
| C | -1.29148 | -0.8869  | -4.66184 |
| C | -2.241   | 0.155467 | -5.25859 |
| F | -1.94842 | 0.321372 | -6.5938  |
| O | -0.28556 | -1.15481 | -5.46615 |
| C | 0.72242  | -2.05548 | -4.96666 |
| H | 0.242888 | -2.99999 | -4.69588 |
| H | 1.141262 | -1.60714 | -4.06287 |
| C | 1.754874 | -2.22812 | -6.05317 |
| H | 1.31186  | -2.66657 | -6.95007 |
| H | 2.548355 | -2.89248 | -5.70137 |
| H | 2.200202 | -1.26815 | -6.31986 |
| C | -4.4936  | -0.78166 | -6.26091 |
| C | -6.17819 | -1.70243 | -8.29083 |
| C | -3.9544  | -1.38864 | -7.40281 |
| C | -5.88419 | -0.64366 | -6.14711 |
| C | -6.7205  | -1.08881 | -7.16151 |
| C | -4.79874 | -1.85838 | -8.40414 |
| H | -2.88343 | -1.49894 | -7.50964 |
| H | -6.28826 | -0.1706  | -5.25948 |
| H | -7.79393 | -0.9588  | -7.07462 |
| H | -4.37565 | -2.33759 | -9.28036 |
| H | -6.83065 | -2.05534 | -9.08277 |
| H | -1.71887 | 0.135129 | 0.913864 |
| H | 1.413199 | 0.359149 | -1.96859 |
| H | -0.54686 | 0.658447 | -1.77153 |
| C | -2.04236 | 1.570708 | -4.54155 |
| O | 0.404428 | 1.06666  | -3.28213 |
| N | -0.81597 | 2.163958 | -4.93234 |
| H | -2.12478 | 1.337342 | -3.46801 |
| C | -3.18314 | 2.501773 | -4.92998 |
| C | -5.26649 | 4.268169 | -5.67933 |
| C | -4.2908  | 2.696143 | -4.10624 |

|   |          |          |          |
|---|----------|----------|----------|
| C | -3.12138 | 3.214152 | -6.13189 |
| C | -4.1492  | 4.073073 | -6.50049 |
| C | -5.31618 | 3.567524 | -4.47393 |
| H | -4.36203 | 2.154038 | -3.16833 |
| H | -2.23928 | 3.099554 | -6.75068 |
| H | -4.07863 | 4.614311 | -7.44035 |
| H | -6.16741 | 3.70427  | -3.81158 |
| C | 0.265174 | 1.869407 | -4.26897 |
| O | 1.342527 | 2.537541 | -4.77993 |
| C | 2.611558 | 2.671942 | -4.11898 |
| C | 3.371167 | 1.347112 | -4.13741 |
| H | 3.52611  | 1.022809 | -5.17001 |
| H | 2.813837 | 0.569539 | -3.6175  |
| H | 4.349746 | 1.45651  | -3.66144 |
| C | 2.452021 | 3.242849 | -2.7105  |
| H | 3.435161 | 3.465318 | -2.28551 |
| H | 1.934292 | 2.552987 | -2.04528 |
| H | 1.880296 | 4.173857 | -2.75313 |
| C | 3.344517 | 3.687118 | -4.9944  |
| H | 3.409926 | 3.322535 | -6.02229 |
| H | 4.356495 | 3.857869 | -4.61652 |
| H | 2.806906 | 4.638057 | -5.00439 |
| H | -6.45988 | 3.464304 | 1.127407 |
| N | -5.56888 | 3.01235  | 1.233415 |
| C | -4.60472 | 2.923663 | 0.255903 |
| C | -5.69047 | 2.323734 | 3.648549 |
| H | -6.69709 | 2.683678 | 3.835459 |
| C | -4.94788 | 1.719256 | 4.65188  |
| H | -5.38302 | 1.602949 | 5.638734 |
| C | -3.63764 | 1.262525 | 4.415888 |
| H | -3.08117 | 0.805347 | 5.227005 |
| C | -3.04395 | 1.396019 | 3.170189 |
| H | -2.02603 | 1.053015 | 3.010598 |
| C | -6.36245 | 5.216928 | -6.08218 |
| H | -6.75268 | 4.974706 | -7.07538 |
| H | -7.1967  | 5.185539 | -5.37743 |
| H | -5.99841 | 6.248734 | -6.12142 |

### PC-III

Zero-point correction=  
0.969162  
Sum of electronic and thermal Enthalpies=  
-3607.077621

Sum of electronic and thermal Free Energies=  
-3607.258676

|   |          |          |          |
|---|----------|----------|----------|
| C | -0.88406 | 0.320331 | -0.20695 |
| S | -1.26743 | 0.931766 | 1.320348 |
| N | 0.377718 | 0.328404 | -0.74051 |
| N | -1.80049 | -0.2077  | -1.03742 |
| C | 1.583969 | 0.730357 | -0.15681 |
| C | 4.096824 | 1.503459 | 0.851413 |
| C | 2.553505 | 1.281284 | -1.00026 |
| C | 1.886569 | 0.553369 | 1.19832  |
| C | 3.127987 | 0.948731 | 1.683862 |
| C | 3.794398 | 1.657092 | -0.49642 |
| H | 2.330466 | 1.410381 | -2.05231 |
| H | 1.149554 | 0.125073 | 1.861815 |
| H | 5.056465 | 1.812085 | 1.24499  |
| C | 4.82302  | 2.200482 | -1.44453 |
| C | 3.460192 | 0.701996 | 3.129089 |
| C | -3.20549 | -0.3045  | -0.71754 |
| H | -3.29736 | -0.19707 | 0.365899 |
| C | -3.73548 | -1.6633  | -1.16205 |
| H | -3.69818 | -1.73843 | -2.25166 |
| H | -4.7693  | -1.76375 | -0.82697 |
| C | -4.01288 | 0.836605 | -1.36964 |
| H | -3.87978 | 0.796989 | -2.45467 |
| H | -3.54869 | 1.769358 | -1.03145 |
| C | -5.46601 | 0.825407 | -1.01646 |
| C | -6.04227 | 1.022534 | 0.289723 |
| C | -7.44918 | 0.920505 | 0.149478 |
| H | -6.51186 | 0.45713  | -2.93823 |
| F | 5.441786 | 1.210983 | -2.13194 |
| F | 5.787326 | 2.894132 | -0.81589 |
| F | 4.280094 | 3.01908  | -2.3689  |
| F | 4.336799 | 1.606789 | 3.607248 |
| F | 4.028865 | -0.51342 | 3.30608  |
| F | 2.375399 | 0.738569 | 3.919716 |
| N | -2.94416 | -2.82005 | -0.64932 |
| C | -2.78746 | -2.79811 | 0.835997 |
| H | -2.28071 | -1.86251 | 1.078994 |
| H | -3.78454 | -2.7597  | 1.284689 |
| C | -3.47908 | -4.10746 | -1.18794 |
| H | -2.72839 | -4.86762 | -0.96915 |
| H | -3.49501 | -3.98713 | -2.27354 |
| C | -1.97453 | -3.96345 | 1.370851 |

|   |          |          |          |
|---|----------|----------|----------|
| H | -1.0157  | -4.04249 | 0.853913 |
| H | -2.49706 | -4.91988 | 1.294266 |
| H | -1.77161 | -3.78473 | 2.428947 |
| C | -4.84109 | -4.52309 | -0.66188 |
| H | -5.62541 | -3.80398 | -0.90643 |
| H | -4.84013 | -4.67689 | 0.419633 |
| H | -5.11518 | -5.47351 | -1.12587 |
| H | 0.460935 | 0.055278 | -1.71832 |
| O | 1.322179 | -0.30415 | -3.50211 |
| C | 1.150116 | -0.45749 | -4.70586 |
| C | -0.29665 | -0.28044 | -5.16156 |
| C | -0.786   | 1.082236 | -4.60276 |
| O | -1.87295 | 1.274621 | -4.11497 |
| H | -1.52354 | -0.63609 | -1.94949 |
| F | -0.41864 | -0.10658 | -6.54353 |
| O | 0.122236 | 2.026374 | -4.8221  |
| C | -0.24359 | 3.372023 | -4.44468 |
| H | -1.16506 | 3.635948 | -4.96963 |
| H | -0.45069 | 3.382717 | -3.37164 |
| C | 0.905802 | 4.276655 | -4.81477 |
| H | 1.100674 | 4.243539 | -5.88892 |
| H | 1.818283 | 3.992011 | -4.28688 |
| H | 0.66033  | 5.305938 | -4.5415  |
| C | 2.306875 | -0.73338 | -5.59831 |
| C | 4.627781 | -1.208   | -7.09416 |
| C | 3.569125 | -0.74297 | -4.98185 |
| C | 2.226222 | -0.95858 | -6.98085 |
| C | 3.382831 | -1.19781 | -7.71738 |
| C | 4.718937 | -0.97697 | -5.72118 |
| H | 3.627282 | -0.55909 | -3.91585 |
| H | 1.271011 | -0.95015 | -7.48438 |
| H | 3.307247 | -1.37294 | -8.7852  |
| H | 5.685442 | -0.97548 | -5.22907 |
| H | 5.525572 | -1.39074 | -7.6756  |
| H | -1.9256  | -2.78527 | -1.08031 |
| C | -1.30606 | -1.40634 | -4.73909 |
| N | -1.25092 | -1.77837 | -3.34484 |
| C | -0.46091 | -2.70657 | -2.84673 |
| O | -0.58377 | -3.09612 | -1.64361 |
| O | 0.504819 | -3.24549 | -3.62488 |
| C | 1.411523 | -4.28471 | -3.14124 |
| C | 2.273036 | -3.75121 | -2.0007  |
| H | 3.029227 | -4.49609 | -1.73608 |

|   |          |          |          |
|---|----------|----------|----------|
| H | 1.668791 | -3.53153 | -1.12159 |
| H | 2.786825 | -2.83838 | -2.31177 |
| C | 0.635872 | -5.53798 | -2.7451  |
| H | 1.339016 | -6.35367 | -2.55252 |
| H | -0.02604 | -5.84434 | -3.55996 |
| H | 0.042616 | -5.36614 | -1.84809 |
| C | 2.282141 | -4.58284 | -4.35777 |
| H | 3.039409 | -5.32616 | -4.09555 |
| H | 2.791921 | -3.67954 | -4.70088 |
| H | 1.680226 | -4.98026 | -5.17811 |
| N | -7.70917 | 0.671796 | -1.17686 |
| C | -6.51933 | 0.622964 | -1.87034 |
| H | -8.62279 | 0.600626 | -1.58818 |
| C | -8.32036 | 1.070019 | 1.230889 |
| H | -9.39593 | 0.991954 | 1.108161 |
| C | -7.75772 | 1.329634 | 2.47188  |
| H | -8.4055  | 1.454123 | 3.333223 |
| C | -6.36372 | 1.442242 | 2.633489 |
| H | -5.95939 | 1.655126 | 3.617313 |
| C | -5.50188 | 1.292904 | 1.557969 |
| H | -4.42872 | 1.393761 | 1.692565 |
| C | -1.45273 | -2.53607 | -5.75338 |
| C | -0.40552 | -3.21588 | -6.37737 |
| C | -2.75487 | -2.92318 | -6.08284 |
| C | -0.65331 | -4.23638 | -7.2899  |
| H | 0.619108 | -2.95662 | -6.14928 |
| C | -3.0053  | -3.95509 | -6.98344 |
| H | -3.59329 | -2.39841 | -5.63189 |
| C | -1.95597 | -4.63276 | -7.60691 |
| H | 0.186565 | -4.73596 | -7.766   |
| H | -4.0319  | -4.22416 | -7.21673 |
| C | -2.21324 | -5.75824 | -8.57108 |
| H | -1.48923 | -5.75554 | -9.39003 |
| H | -2.13588 | -6.73054 | -8.07222 |
| H | -3.21382 | -5.6911  | -9.00475 |
| H | -2.24763 | -0.85342 | -4.82398 |

#### PC-IV

Zero-point correction=  
 0.969022  
 Sum of electronic and thermal Enthalpies=  
 -3607.088463  
 Sum of electronic and thermal Free Energies=  
 -3607.272797

|   |          |          |          |   |          |          |          |
|---|----------|----------|----------|---|----------|----------|----------|
| C | -0.84261 | 0.351304 | -0.4598  | H | -1.37978 | -3.66101 | 2.451192 |
| S | -0.97874 | 0.849427 | 1.149731 | C | -4.88336 | -4.45308 | -0.08973 |
| N | 0.312639 | 0.431508 | -1.18309 | H | -5.67359 | -3.71426 | -0.23686 |
| N | -1.86232 | -0.2008  | -1.14649 | H | -4.70909 | -4.56175 | 0.983027 |
| C | 1.577812 | 0.870662 | -0.77109 | H | -5.26066 | -5.41008 | -0.45795 |
| C | 4.184559 | 1.705482 | -0.12385 | H | 0.299918 | 0.030218 | -2.11936 |
| C | 2.689263 | 0.19286  | -1.27822 | O | 1.050523 | -0.30534 | -3.92798 |
| C | 1.776802 | 1.983398 | 0.052668 | C | 0.689079 | -0.60219 | -5.04858 |
| C | 3.071597 | 2.378685 | 0.37285  | C | -0.77186 | -0.52902 | -5.48126 |
| C | 3.975736 | 0.614972 | -0.96053 | C | -1.34348 | 0.839321 | -5.03392 |
| H | 2.538196 | -0.66097 | -1.92606 | O | -2.11136 | 0.893597 | -4.09527 |
| H | 0.926773 | 2.529558 | 0.434846 | H | -1.71009 | -0.58241 | -2.09642 |
| H | 5.186078 | 2.027974 | 0.129336 | F | -0.84071 | -0.57911 | -6.87032 |
| C | 5.144318 | -0.09273 | -1.58035 | H | -2.01958 | -2.83226 | -1.04838 |
| C | 3.270504 | 3.540073 | 1.306188 | C | -1.51871 | -1.80768 | -4.96316 |
| C | -3.2042  | -0.30262 | -0.62087 | N | -1.50294 | -1.94456 | -3.52724 |
| H | -3.12635 | -0.16811 | 0.460117 | C | -0.76823 | -2.89469 | -2.99984 |
| C | -3.79714 | -1.66889 | -0.93541 | H | -0.94674 | -2.60913 | -5.44483 |
| H | -3.9046  | -1.79823 | -2.01515 | C | -2.92189 | -1.89676 | -5.54718 |
| H | -4.78292 | -1.73232 | -0.47093 | C | -5.51381 | -2.16411 | -6.67011 |
| C | -4.10748 | 0.827884 | -1.15819 | C | -3.12973 | -2.61901 | -6.72359 |
| H | -4.16017 | 0.766892 | -2.24903 | C | -4.03344 | -1.30899 | -4.93911 |
| H | -3.59139 | 1.765581 | -0.92518 | C | -5.3028  | -1.4395  | -5.49215 |
| C | -5.48103 | 0.834119 | -0.56641 | C | -4.4015  | -2.74988 | -7.27669 |
| C | -5.82816 | 1.069893 | 0.812502 | H | -2.28322 | -3.08483 | -7.21948 |
| C | -7.23839 | 0.969038 | 0.914803 | H | -3.88725 | -0.73068 | -4.03653 |
| H | -6.83701 | 0.41233  | -2.27156 | H | -6.14866 | -0.96145 | -5.00428 |
| F | 4.929593 | -1.41831 | -1.70709 | H | -4.52822 | -3.31692 | -8.19473 |
| F | 6.275936 | 0.061783 | -0.87123 | C | -6.89416 | -2.32324 | -7.24657 |
| F | 5.404138 | 0.367968 | -2.828   | H | -6.85568 | -2.57426 | -8.30908 |
| F | 4.442452 | 4.169426 | 1.085579 | H | -7.47958 | -1.40631 | -7.13762 |
| F | 3.281749 | 3.14752  | 2.597855 | H | -7.44466 | -3.1237  | -6.74006 |
| F | 2.29704  | 4.46093  | 1.188866 | O | -0.79163 | -3.18742 | -1.76318 |
| N | -2.96776 | -2.8177  | -0.47085 | O | 0.071782 | -3.59038 | -3.8209  |
| C | -2.59557 | -2.72399 | 0.97295  | C | 0.807603 | -4.77029 | -3.39711 |
| H | -2.03414 | -1.79506 | 1.090338 | C | -0.14282 | -5.85301 | -2.89246 |
| H | -3.51477 | -2.63096 | 1.55916  | H | 0.411962 | -6.78208 | -2.73356 |
| C | -3.61375 | -4.11174 | -0.84874 | H | -0.92414 | -6.04611 | -3.63311 |
| H | -2.85837 | -4.88626 | -0.71105 | H | -0.60722 | -5.5562  | -1.95298 |
| H | -3.80453 | -4.04462 | -1.92232 | C | 1.476998 | -5.23224 | -4.68802 |
| C | -1.73979 | -3.88594 | 1.445011 | H | 2.085708 | -6.12042 | -4.50043 |
| H | -0.86873 | -4.01551 | 0.799106 | H | 2.12535  | -4.44879 | -5.08777 |
| H | -2.28725 | -4.83022 | 1.495162 | H | 0.727904 | -5.47794 | -5.44504 |

|   |          |          |          |
|---|----------|----------|----------|
| C | 1.860265 | -4.40389 | -2.35541 |
| H | 2.468107 | -5.28209 | -2.11855 |
| H | 1.391196 | -4.03849 | -1.44281 |
| H | 2.526902 | -3.62861 | -2.74256 |
| N | -7.71855 | 0.684458 | -0.34102 |
| C | -6.66332 | 0.611164 | -1.22372 |
| H | -8.68837 | 0.601735 | -0.58918 |
| C | -7.91473 | 1.150621 | 2.12322  |
| H | -8.99546 | 1.072651 | 2.186011 |
| C | -7.15087 | 1.441522 | 3.243821 |
| H | -7.64392 | 1.591157 | 4.198557 |
| C | -5.74969 | 1.552774 | 3.164669 |
| H | -5.18516 | 1.7892   | 4.060258 |
| C | -5.08149 | 1.37138  | 1.963759 |
| H | -4.00071 | 1.468368 | 1.914431 |
| O | 1.495861 | -1.02718 | -6.00636 |
| C | 2.895463 | -1.13371 | -5.65937 |
| H | 2.992812 | -1.87363 | -4.86161 |
| H | 3.229127 | -0.16971 | -5.26877 |
| C | 3.643984 | -1.53717 | -6.90538 |
| H | 3.532153 | -0.78739 | -7.69166 |
| H | 4.707372 | -1.63372 | -6.67293 |
| H | 3.286218 | -2.49557 | -7.28775 |
| C | -0.91423 | 2.079908 | -5.74367 |
| C | 0.060732 | 2.112546 | -6.7495  |
| C | -1.50556 | 3.280786 | -5.32624 |
| C | 0.436597 | 3.325708 | -7.31833 |
| H | 0.520622 | 1.198592 | -7.10221 |
| C | -1.13474 | 4.48747  | -5.90185 |
| H | -2.25157 | 3.24245  | -4.54083 |
| C | -0.15966 | 4.512314 | -6.89945 |
| H | 1.193656 | 3.342078 | -8.09493 |
| H | -1.59947 | 5.410056 | -5.57116 |
| H | 0.13437  | 5.455404 | -7.34831 |

## Product

Zero-point correction=  
0.486028  
Sum of electronic and thermal Enthalpies=  
-1461.396588  
Sum of electronic and thermal Free Energies=  
-1461.496200

|   |          |          |          |
|---|----------|----------|----------|
| C | -0.59506 | 0.3036   | -0.32813 |
| C | -0.92905 | -0.91017 | 0.569336 |

|   |          |          |          |
|---|----------|----------|----------|
| C | -1.59407 | 1.453142 | -0.12343 |
| F | -0.72853 | -0.12762 | -1.64177 |
| O | -0.12751 | -1.26978 | 1.413404 |
| O | -1.92715 | 2.205924 | -1.00382 |
| C | -2.21985 | -1.6251  | 0.378138 |
| C | -4.62453 | -3.03445 | 0.179426 |
| C | -3.16578 | -1.27343 | -0.59429 |
| C | -2.49118 | -2.6927  | 1.245184 |
| C | -3.68533 | -3.39278 | 1.147102 |
| C | -4.36224 | -1.977   | -0.68844 |
| H | -2.97097 | -0.46924 | -1.29283 |
| H | -1.74977 | -2.95247 | 1.992023 |
| H | -3.88679 | -4.21692 | 1.822912 |
| H | -5.08771 | -1.70113 | -1.44589 |
| H | -5.55844 | -3.58125 | 0.100686 |
| O | -2.00084 | 1.505255 | 1.14028  |
| C | -2.8609  | 2.609546 | 1.494295 |
| H | -3.76456 | 2.549751 | 0.882478 |
| H | -2.34088 | 3.537563 | 1.245276 |
| C | -3.15762 | 2.498366 | 2.969351 |
| H | -3.66476 | 1.558476 | 3.198307 |
| H | -3.80834 | 3.32233  | 3.273002 |
| H | -2.23783 | 2.550665 | 3.555291 |
| C | 0.850374 | 0.856595 | -0.19383 |
| H | 0.9769   | 1.43843  | -1.11166 |
| C | 1.07642  | 1.807084 | 0.972514 |
| C | 1.526658 | 3.660918 | 3.06447  |
| C | 1.30437  | 1.368533 | 2.27973  |
| C | 1.080696 | 3.181364 | 0.7267   |
| C | 1.296673 | 4.093637 | 1.757442 |
| C | 1.525763 | 2.282005 | 3.303868 |
| H | 1.29363  | 0.307771 | 2.501296 |
| H | 0.922445 | 3.546208 | -0.28411 |
| H | 1.299383 | 5.157077 | 1.535569 |
| H | 1.700043 | 1.915754 | 4.311957 |
| C | 1.802429 | 4.638499 | 4.173675 |
| H | 2.878585 | 4.729327 | 4.356089 |
| H | 1.340418 | 4.319694 | 5.111743 |
| H | 1.425826 | 5.634802 | 3.931042 |
| N | 1.812416 | -0.20947 | -0.28876 |
| H | 1.819306 | -0.93321 | 0.41181  |
| C | 2.831343 | -0.15823 | -1.19147 |
| O | 2.971477 | 0.717169 | -2.0261  |

|   |          |          |          |
|---|----------|----------|----------|
| O | 3.637688 | -1.22169 | -1.01251 |
| C | 4.81197  | -1.423   | -1.85833 |
| C | 5.792072 | -0.26825 | -1.67962 |
| H | 6.038769 | -0.14038 | -0.62207 |
| H | 5.37723  | 0.663922 | -2.06223 |
| H | 6.716717 | -0.4904  | -2.21967 |
| C | 5.400693 | -2.71602 | -1.30735 |
| H | 5.666304 | -2.60018 | -0.25372 |
| H | 6.301541 | -2.98319 | -1.8653  |
| H | 4.682032 | -3.53445 | -1.39502 |
| C | 4.388846 | -1.60242 | -3.31242 |
| H | 5.26212  | -1.8708  | -3.91358 |
| H | 3.955045 | -0.68634 | -3.71237 |
| H | 3.656192 | -2.40946 | -3.3978  |
